# Supplementary material for: In situ generation and trapping of thioimidates: an intermolecular tandem reaction to 4-acylimino-4H-3,1-benzothiazines
Source: Royal Society of Chemistry journal article supplement (doi:10.1039/c6ra00196c), 2016-01-01

## Supporting Information

### In Situ Generation and Trapping of Thioimidates:

### An Intermolecular Tandem Reaction to 4-Acylimino-4*H*-3,1-benzothiazines †

Christian Steinebach,<sup>a</sup> Anna-Christina Schulz-Fincke,<sup>a</sup> Gregor Schnakenburg,<sup>b</sup> and Michael Gütschow\*<sup>a</sup>

<sup>a</sup> Pharmaceutical Institute, Pharmaceutical Chemistry I, University of Bonn,  
An der Immenburg 4, 53121 Bonn, Germany

<sup>b</sup> Institute of Inorganic Chemistry, University of Bonn, Gerhard-Domagk-Strasse 1, 53121 Bonn,  
Germany

|                                                                                                                                                            |     |
|------------------------------------------------------------------------------------------------------------------------------------------------------------|-----|
| <sup>1</sup> H NMR and <sup>13</sup> C NMR Spectra of Ring Closure Experiments                                                                             | S2  |
| Color Change in the Course of the Formation of Acyliminum Salts                                                                                            | S6  |
| Calculations of Molecular Planarity and Plane Deviations                                                                                                   | S7  |
| HRMS-ESI of the Product of the Treatment of <b>2c</b> with Ac <sub>2</sub> O/H <sub>2</sub> SO <sub>4</sub> and Workup with H <sub>2</sub> O               | S9  |
| HRMS-ESI of the Product of the Treatment of <b>2c</b> with Ac <sub>2</sub> O/H <sub>2</sub> SO <sub>4</sub> and Workup with H <sub>2</sub> <sup>18</sup> O | S10 |
| Enzymatic Studies                                                                                                                                          | S11 |
| <sup>1</sup> H NMR and <sup>13</sup> C NMR Spectra of All Compounds                                                                                        | S12 |

## $^1\text{H}$ NMR and $^{13}\text{C}$ NMR Spectra of Ring Closure Experiments

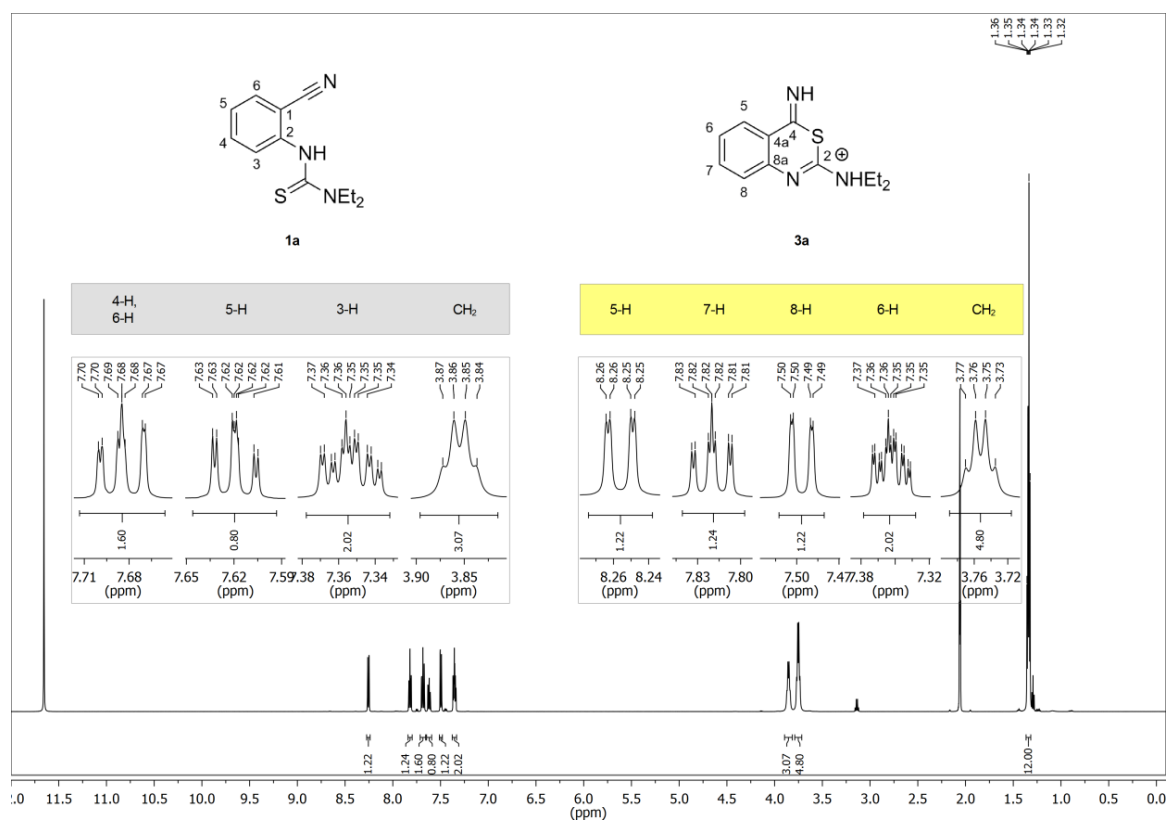

**Figure S1.**  $^1\text{H}$  NMR spectrum (600 MHz,  $\text{CD}_3\text{CO}_2\text{D}$ ) recorded of a reaction mixture of **1a** (10 mg) dissolved in  $\text{CD}_3\text{CO}_2\text{D}$  (0.6 mL) after in incubation of 2 h at room temperature. The spectrum contains signals of **1a** (gray, left) and **3a** (yellow, right). Integration of the signals indicated a **3a** to **1a** ratio of 3:2.

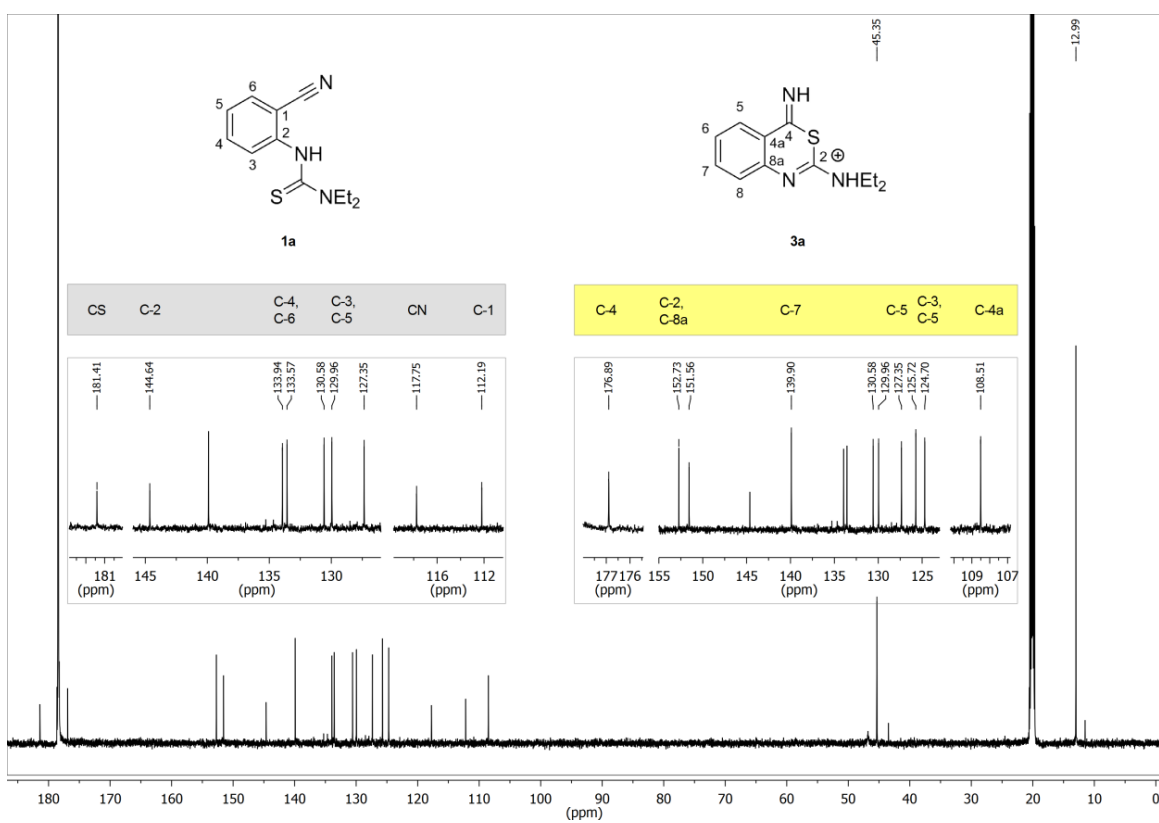

**Figure S2.** <sup>13</sup>C NMR spectrum (151 MHz, CD<sub>3</sub>CO<sub>2</sub>D) recorded of a reaction mixture of **1a** (10 mg) dissolved in CD<sub>3</sub>CO<sub>2</sub>D (0.6 mL) after in incubation of 2 h at room temperature. The spectrum contains signals of **1a** (gray, left) and **3a** (yellow, right).

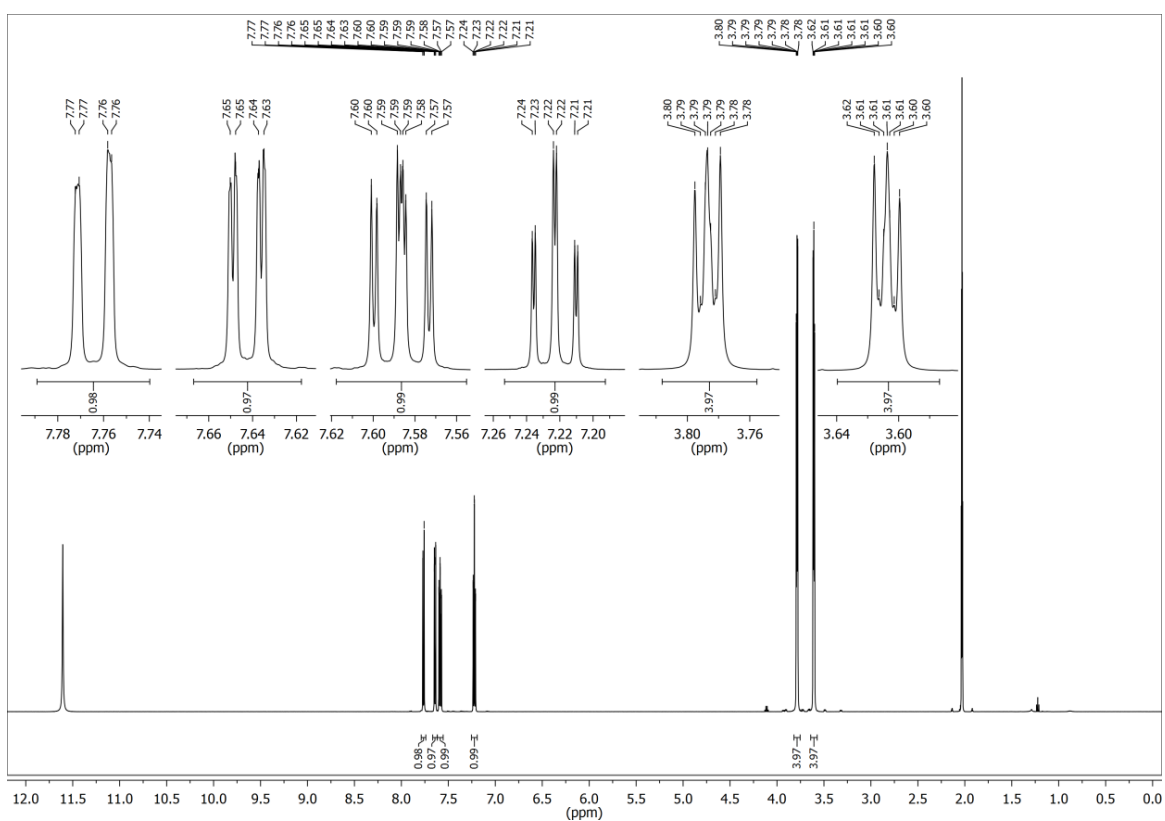

**Figure S3.** <sup>1</sup>H NMR spectrum (600 MHz, CD<sub>3</sub>CO<sub>2</sub>D) recorded of a reaction mixture of **2b** (10 mg) dissolved in CD<sub>3</sub>CO<sub>2</sub>D (0.6 mL) after in incubation of 2 h at room temperature. The spectrum contains only signals of **2b**.

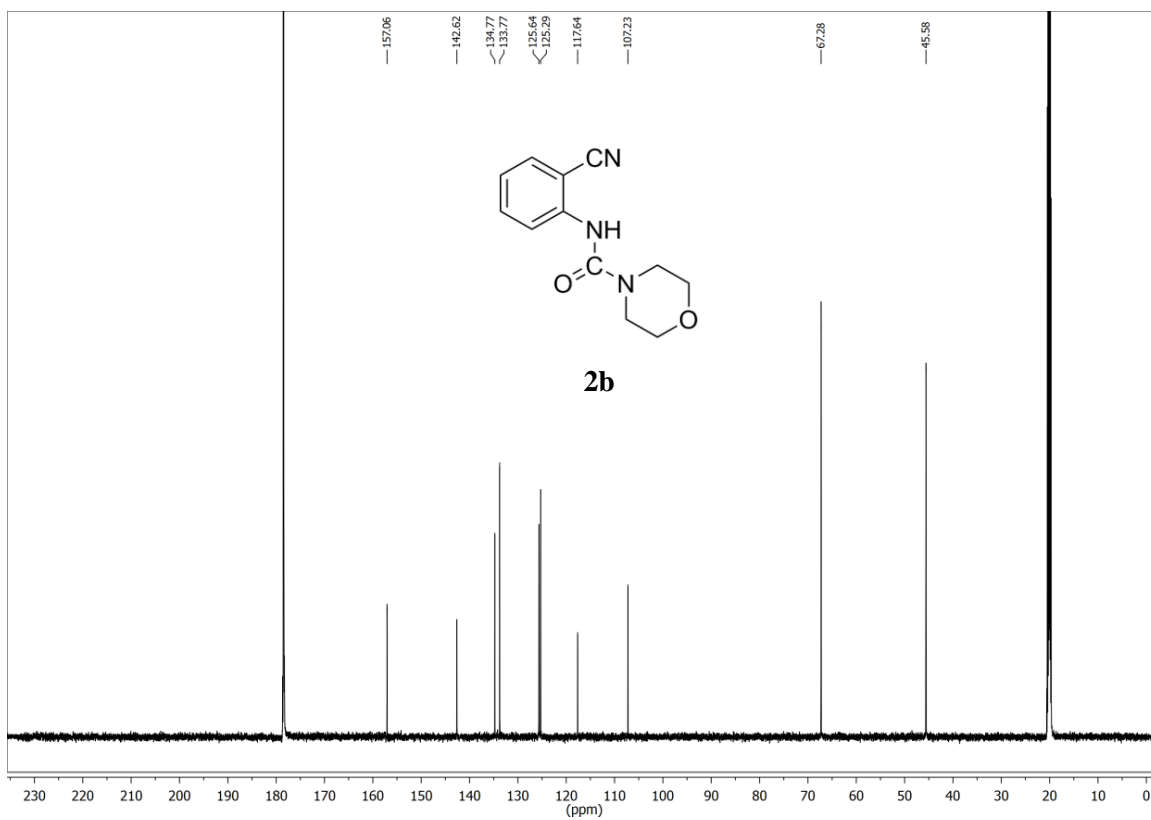

**Figure S4.** <sup>13</sup>C NMR spectrum (151 MHz, CD<sub>3</sub>CO<sub>2</sub>D) recorded of a reaction mixture of **2b** (10 mg) dissolved in CD<sub>3</sub>CO<sub>2</sub>D (0.6 mL) after in incubation of 2 h at room temperature. The spectrum contains only signals of **2b**.

### Color Change in the Course of the Formation of Acyliminium Salts

4-Acyliminothiazinium salts **9** are red colored while acylimino-4*H*-3,1-benzothiazines **11-16** gave yellow solutions. To illustrate this, compound **12a** (10 mg) was dissolved in MeCN (5 mL) in a small reaction tube containing a stirring bar (left). After addition of concd H<sub>2</sub>SO<sub>4</sub> (1 drop), a red solution was formed (right).

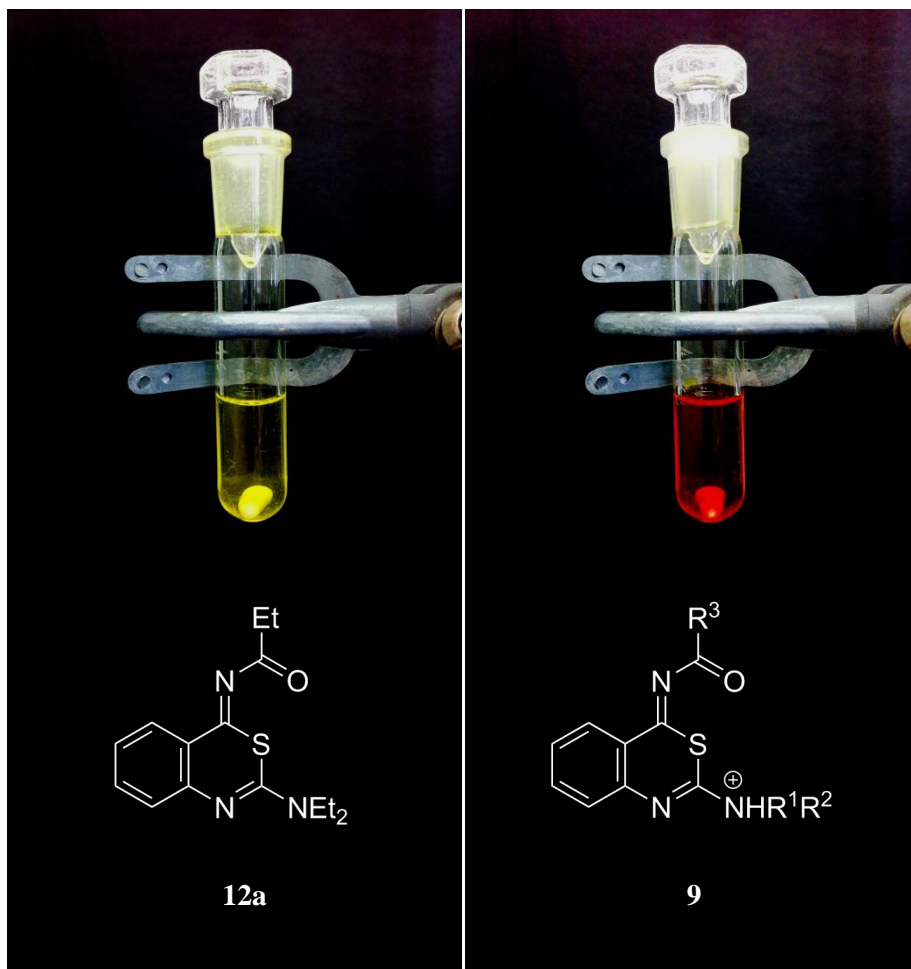

**Figure S5:** Bathochromic shift upon protonation of **12a**.

## Calculations of Molecular Planarity and Plane Deviations

The equation  $P \times x + Q \times y + R \times z - S = 0$  was used, where P, Q, R, S are constants and x, y, z are fractional coordinates (see CIF file for more detail). Least-squares solution of the equation was  $P = -5.2029$ ,  $Q = 6.7332$ ,  $R = 0.5685$ ,  $S = -0.9415$ . Calculation was performed with PLATON for Windows (A. L. Spek, *J. Appl. Cryst.*, 2003, **36**, 7; A. L. Spek, *Acta Cryst.*, 2009, **D65**, 148).

**Table S1:** Plane deviation of the benzothiazine skeleton of **12a**.

| Atom  | Distance (Å) | x      | y      | z       | X      | Y      | Z       |
|-------|--------------|--------|--------|---------|--------|--------|---------|
| S     | -0.09205     | 0.5006 | 0.2145 | 0.2232  | 4.4314 | 2.7811 | 1.9978  |
| N(1)  | 0.05970      | 0.3428 | 0.1323 | 0.0187  | 2.9966 | 1.2979 | 0.1671  |
| C(2)  | 0.04935      | 0.3551 | 0.1289 | 0.1537  | 3.1296 | 1.7405 | 1.3756  |
| C(4)  | -0.01463     | 0.6034 | 0.3193 | 0.0595  | 5.3306 | 3.1824 | 0.5328  |
| C(4a) | 0.03077      | 0.5626 | 0.3063 | -0.0814 | 4.9443 | 2.5670 | -0.7284 |
| C(5)  | 0.05823      | 0.6496 | 0.3885 | -0.2100 | 5.7034 | 2.8806 | -1.8798 |
| C(6)  | 0.01567      | 0.6245 | 0.3742 | -0.3450 | 5.4520 | 2.2731 | -3.0882 |
| C(7)  | -0.05477     | 0.5108 | 0.2768 | -0.3559 | 4.4266 | 1.3276 | -3.1866 |
| C(8)  | -0.05627     | 0.4224 | 0.1978 | -0.2329 | 3.6562 | 1.0248 | -2.0846 |
| C(8a) | 0.00402      | 0.4442 | 0.2119 | -0.0936 | 3.8806 | 1.6448 | -0.8380 |

The equation  $P \times x + Q \times y + R \times z - S = 0$  was used (see CIF file for more detail). Least-squares solution of the equation was  $P = -5.0320$ ,  $Q = 7.1351$ ,  $R = 1.9429$ ,  $S = -0.5952$ .

**Table S2:** Plane deviation of the atoms S, C(4), N(3), C(13) and O of **12a**.

| Atom  | Distance (Å) | x      | y      | z      | X      | Y      | Z      |
|-------|--------------|--------|--------|--------|--------|--------|--------|
| S     | 0.04018      | 0.5006 | 0.2145 | 0.2232 | 4.4314 | 2.7811 | 1.9978 |
| O     | -0.05528     | 0.7245 | 0.3328 | 0.3193 | 6.4252 | 4.2207 | 2.8588 |
| N(3)  | 0.00604      | 0.7167 | 0.4062 | 0.0614 | 6.3443 | 3.9981 | 0.5497 |
| C(4)  | -0.04760     | 0.6034 | 0.3193 | 0.0595 | 5.3306 | 3.1824 | 0.5328 |
| C(13) | 0.05665      | 0.7689 | 0.4136 | 0.1951 | 6.8219 | 4.5372 | 1.7465 |



## HRMS-ESI of the Product of the Treatment of 2c with Ac<sub>2</sub>O/H<sub>2</sub>SO<sub>4</sub> and Workup with H<sub>2</sub>O

**Analysis Info** Acquisition Date 10/7/2015 7:38:20 PM  
 Analysis Name D:\Data\Mueller\2015-10-07\ASF\_BzM\_S\_GB3\_01\_9567.d Operator BDAL@DE  
 Method standard-smallmolecules\_acetat\_posuv220.m Instrument micrOTOF-Q III  
 Sample Name ASF\_BzM\_S  
 Comment

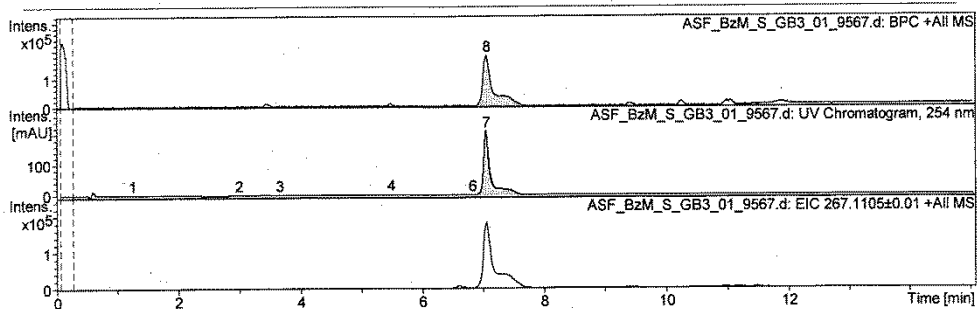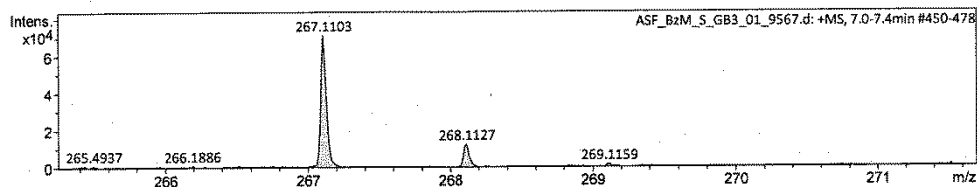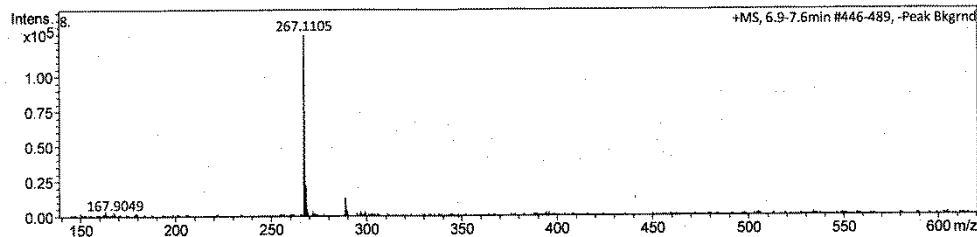

| # | RT [min] | Area         | Int. Type | I      | S/N       | Chromatogram            | Max. m/z | FWHM [min] | Area Frac. % |
|---|----------|--------------|-----------|--------|-----------|-------------------------|----------|------------|--------------|
| 1 | 1.2      | 2.8512       | Manual    | 0      | 1532.8    | UV Chromatogram, 254 nm | 0.0000   |            | 0.17430      |
| 2 | 3.0      | 2.6415       | Manual    | 0      | 1683.6    | UV Chromatogram, 254 nm | 0.0000   |            | 0.16148      |
| 3 | 3.7      | 2.9989       | Manual    | 1      | 2567.9    | UV Chromatogram, 254 nm | 0.0000   |            | 0.18332      |
| 4 | 5.5      | 7.6722       | Manual    | 2      | 7525.7    | UV Chromatogram, 254 nm | 0.0000   |            | 0.46901      |
| 5 | 6.7      | 1.2527       | Manual    | 1      | 1576.9    | UV Chromatogram, 254 nm | 0.0000   |            | 0.07658      |
| 6 | 6.8      | 0.1325       | Manual    | 1      | 1084.4    | UV Chromatogram, 254 nm | 0.0000   |            | 0.00810      |
| 7 | 7.0      | 1618.2816    | Manual    | 209    | 1047610.4 | UV Chromatogram, 254 nm | 0.0000   |            | 98.92722     |
| 8 | 7.1      | 2167797.2500 | Manual    | 182201 | 85.6      | BPC +All MS             | 267.1105 |            | 100.00000    |

# HRMS-ESI of the Product of the Treatment of 2c with Ac<sub>2</sub>O/H<sub>2</sub>SO<sub>4</sub> and Workup with H<sub>2</sub><sup>18</sup>O

**Analysis Info**  
 Analysis Name: D:\Data\Mueller\2015-10-07\ASF\_BzM\_18\_S\_GB2\_01\_9566.d  
 Method: standard-smallmolecules\_acetat\_posuv220.m  
 Sample Name: ASF\_BzM\_18\_S  
 Comment:  
 Acquisition Date: 10/7/2015 7:17:16 PM  
 Operator: BDAL@DE  
 Instrument: microTOF-Q III

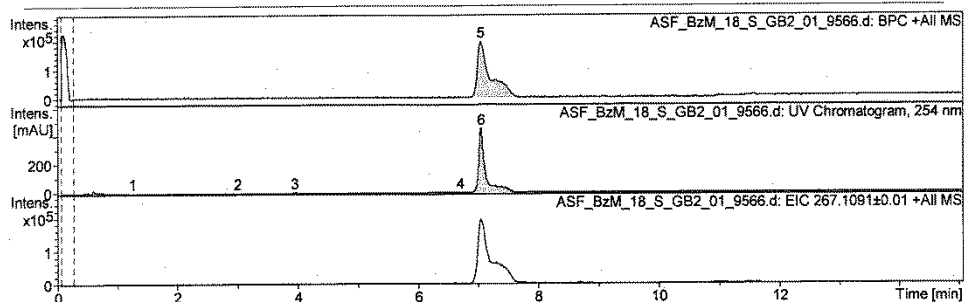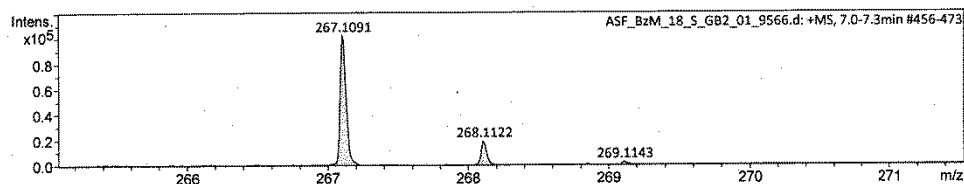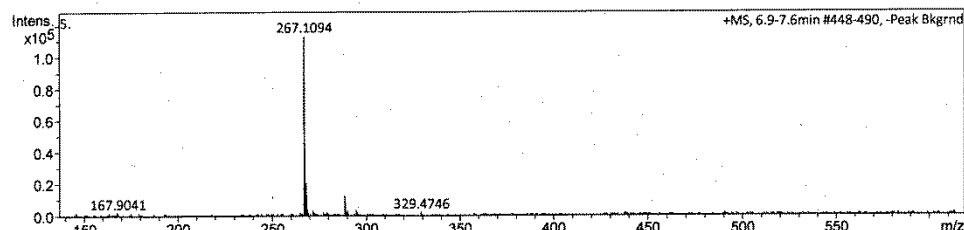

| # | RT [min] | Area         | Int. Type | I      | S/N       | Chromatogram            | Max. m/z | FWHM [min] | Area Frac. % |
|---|----------|--------------|-----------|--------|-----------|-------------------------|----------|------------|--------------|
| 1 | 1.2      | 1.9549       | Manual    | 0      | 1320.9    | UV Chromatogram, 254 nm | 0.0000   | 0.05637    |              |
| 2 | 3.0      | 3.9733       | Manual    | 0      | 2598.6    | UV Chromatogram, 254 nm | 0.0000   | 0.11458    |              |
| 3 | 3.9      | 2.0620       | Manual    | 1      | 1906.0    | UV Chromatogram, 254 nm | 0.0000   | 0.05946    |              |
| 4 | 6.7      | 1.3353       | Manual    | 1      | 1504.1    | UV Chromatogram, 254 nm | 0.0000   | 0.03851    |              |
| 5 | 7.0      | 2794776.0000 | Manual    | 196199 | 106.7     | BPC +All MS             | 267.1094 | 100.00000  |              |
| 6 | 7.0      | 3458.3660    | Manual    | 451    | 2264035.3 | UV Chromatogram, 254 nm | 0.0000   | 99.73107   |              |

## Enzymatic Studies

**Table S3.** Protease inhibition by 4-acylimino-2-amino-4*H*-3,1-benzothiazines.

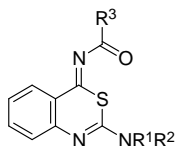

| Compd      | NR <sup>1</sup> R <sup>2</sup> | R <sup>3</sup>     | IC <sub>50</sub> (μM) <sup>a</sup> |                         |             |             |
|------------|--------------------------------|--------------------|------------------------------------|-------------------------|-------------|-------------|
|            |                                |                    | HLE                                | chymotrypsin            | cathepsin B | cathepsin L |
| <b>11a</b> | N(Et) <sub>2</sub>             | Me                 | >100                               | >100                    | >20         | >20         |
| <b>11b</b> | morpholino                     | Me                 | >100                               | >100                    | >20         | >20         |
| <b>11c</b> | N(Me)Bn                        | Me                 | >20                                | >20                     | >20         | >20         |
| <b>12a</b> | N(Et) <sub>2</sub>             | Et                 | >100                               | >100                    | >20         | >20         |
| <b>12b</b> | morpholino                     | Et                 | >100                               | >100                    | >20         | >20         |
| <b>12c</b> | N(Me)Bn                        | Et                 | 4.16 ± 1.52 <sup>b</sup>           | >100                    | >20         | >20         |
| <b>13a</b> | N(Et) <sub>2</sub>             | <i>i</i> -Pr       | >20                                | >20                     | >20         | >100        |
| <b>13b</b> | morpholino                     | <i>i</i> -Pr       | >100                               | >100                    | >20         | >20         |
| <b>13c</b> | N(Me)Bn                        | <i>i</i> -Pr       | 6.45 ± 0.50 <sup>b</sup>           | 10.4 ± 0.2 <sup>b</sup> | >100        | >100        |
| <b>14a</b> | N(Et) <sub>2</sub>             | <i>i</i> -Bu       | 6.85 ± 2.08 <sup>b</sup>           | >20                     | >20         | >100        |
| <b>14b</b> | morpholino                     | <i>i</i> -Bu       | >20                                | >100                    | >20         | >20         |
| <b>14c</b> | N(Me)Bn                        | <i>i</i> -Bu       | 3.88 ± 0.78 <sup>b</sup>           | >20                     | >20         | >100        |
| <b>15a</b> | N(Et) <sub>2</sub>             | CH <sub>2</sub> Cl | >20                                | >20                     | >20         | >100        |
| <b>15b</b> | morpholino                     | CH <sub>2</sub> Cl | >20                                | >20                     | >20         | >100        |
| <b>15c</b> | N(Me)Bn                        | CH <sub>2</sub> Cl | >20                                | >100                    | >20         | >100        |
| <b>16a</b> | N(Et) <sub>2</sub>             | OBn                | 5.50 ± 1.92 <sup>b</sup>           | >20                     | >100        | >100        |
| <b>16b</b> | morpholino                     | OBn                | 15.5 ± 2.4 <sup>b</sup>            | >20                     | >100        | >100        |
| <b>16c</b> | N(Me)Bn                        | OBn                | 3.17 ± 1.63 <sup>b</sup>           | >20                     | >100        | >100        |

<sup>a</sup> IC<sub>50</sub> values obtained from duplicate measurements at a single inhibitor concentration.

<sup>b</sup> IC<sub>50</sub> values ± standard errors obtained from duplicate measurements with five different inhibitor concentrations (0.5-10 μM).

**<sup>1</sup>H NMR and <sup>13</sup>C NMR Spectra of All Compounds**  
**2-(3-Diethylthioureido)benzonitrile (1a), DMSO-d<sub>6</sub>**

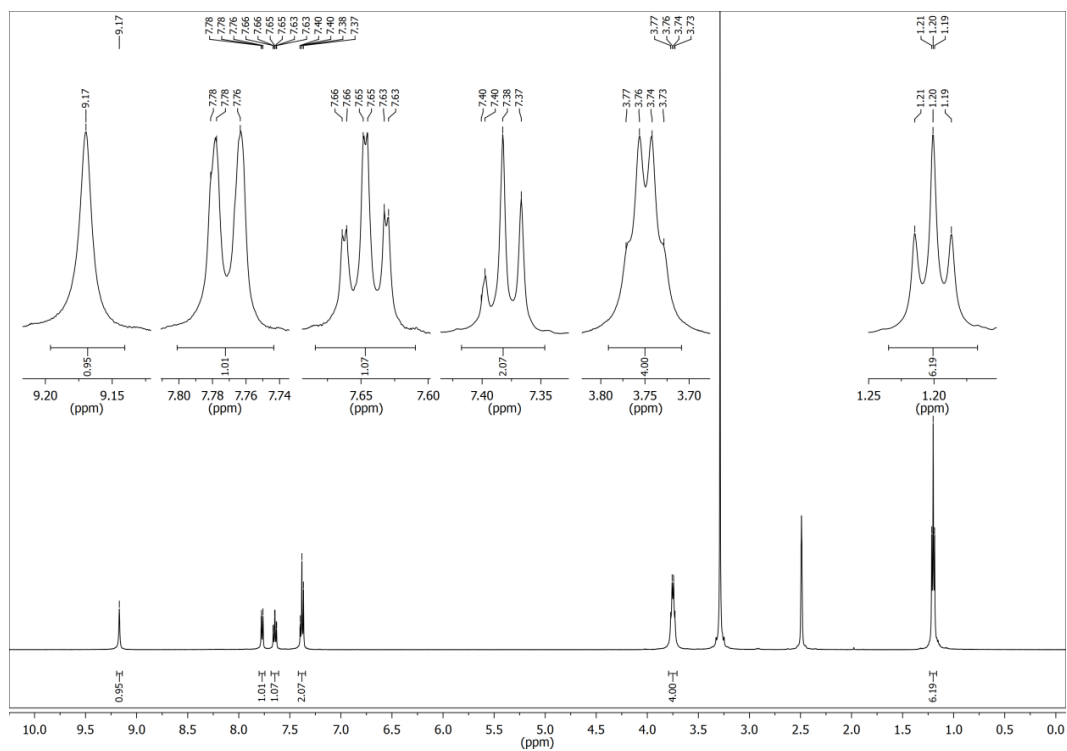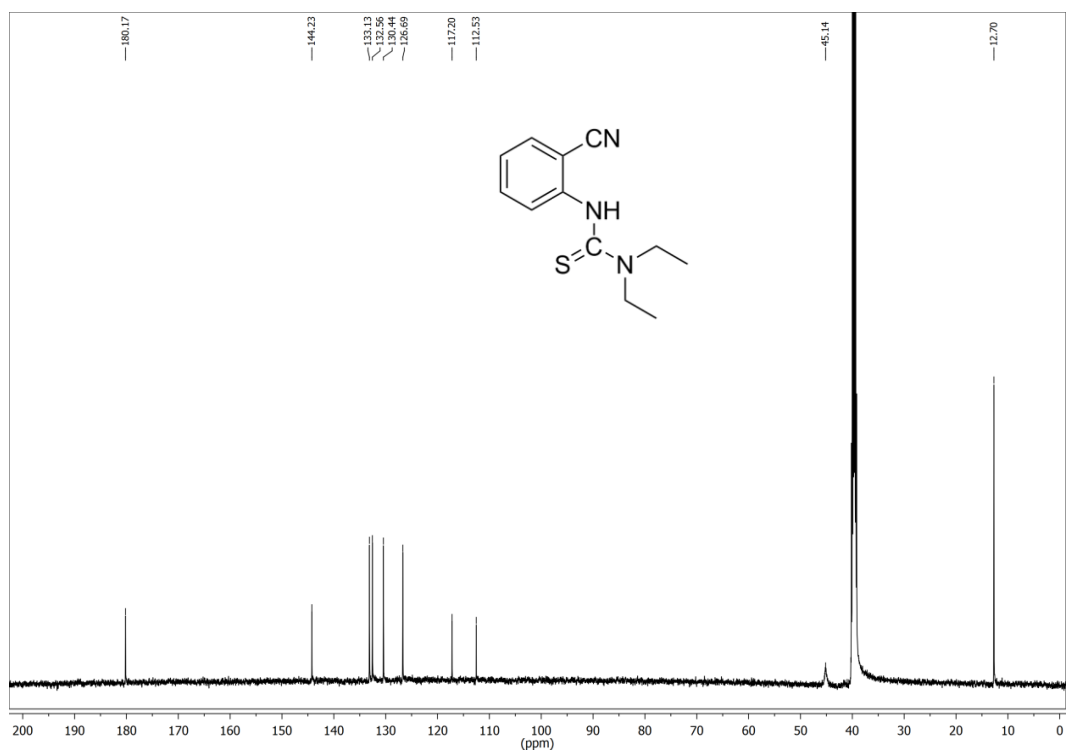

2-(Morpholinothiocabonylamino)benzonitrile (1b), DMSO-*d*<sub>6</sub>

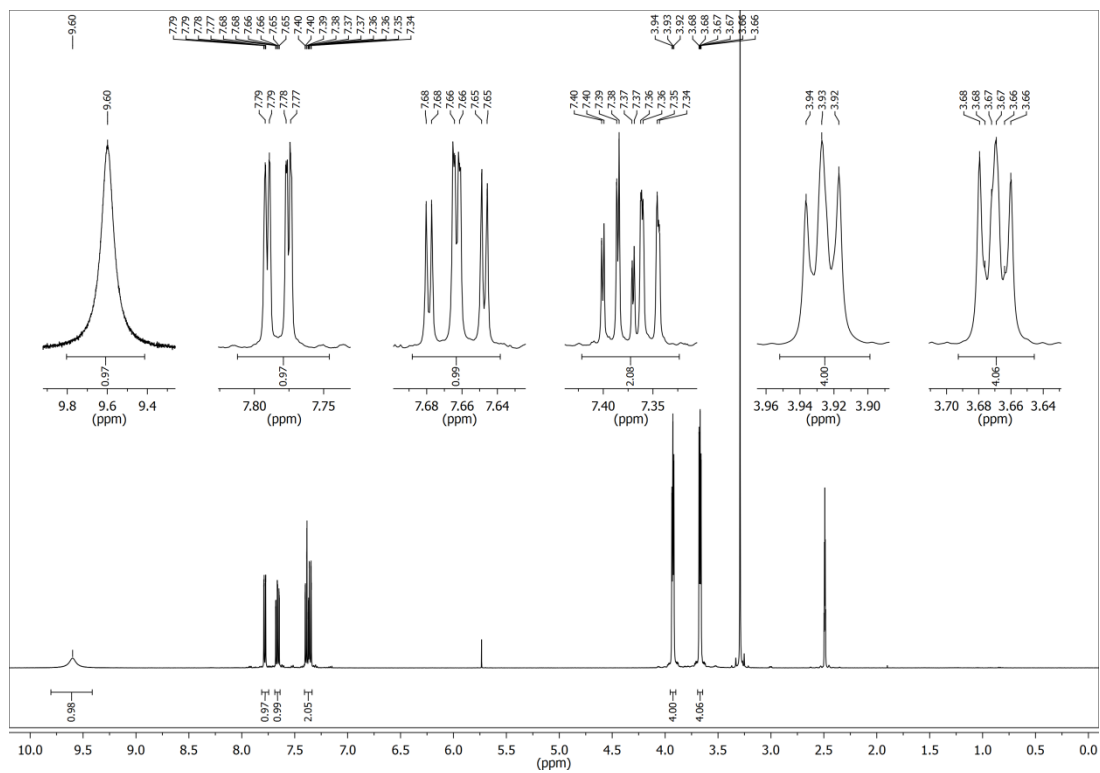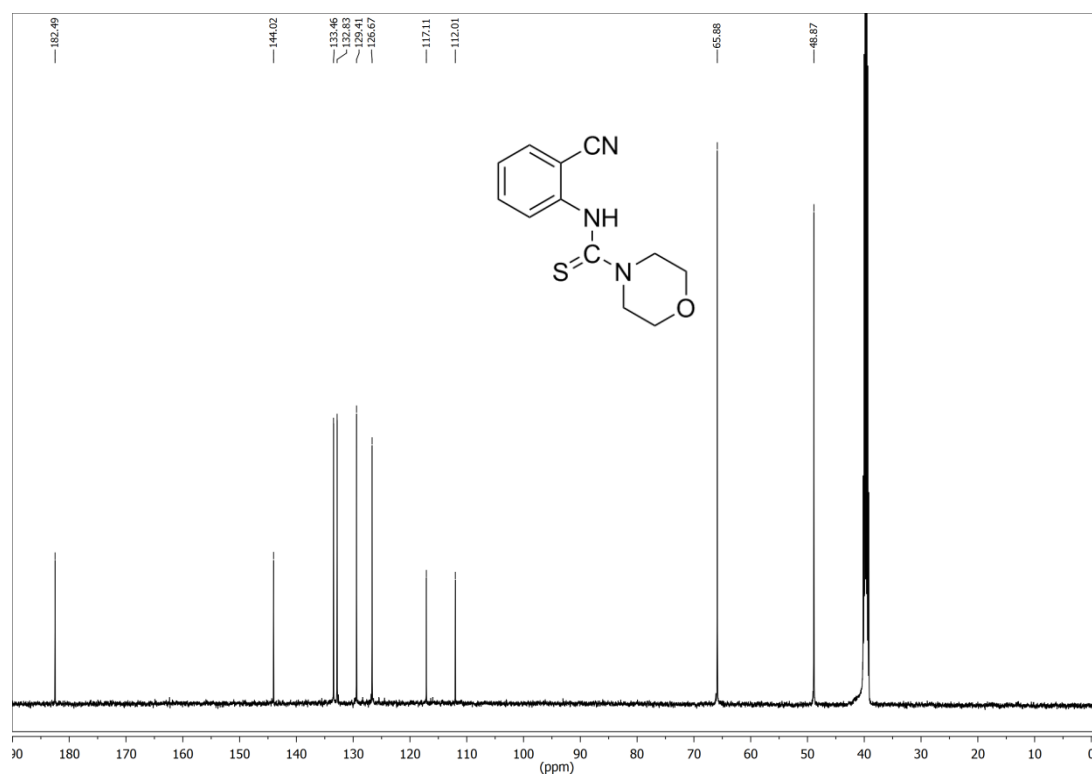

**2-(3-Benzyl-3-methylthiureido)benzonitrile (1c), DMSO-*d*<sub>6</sub>**

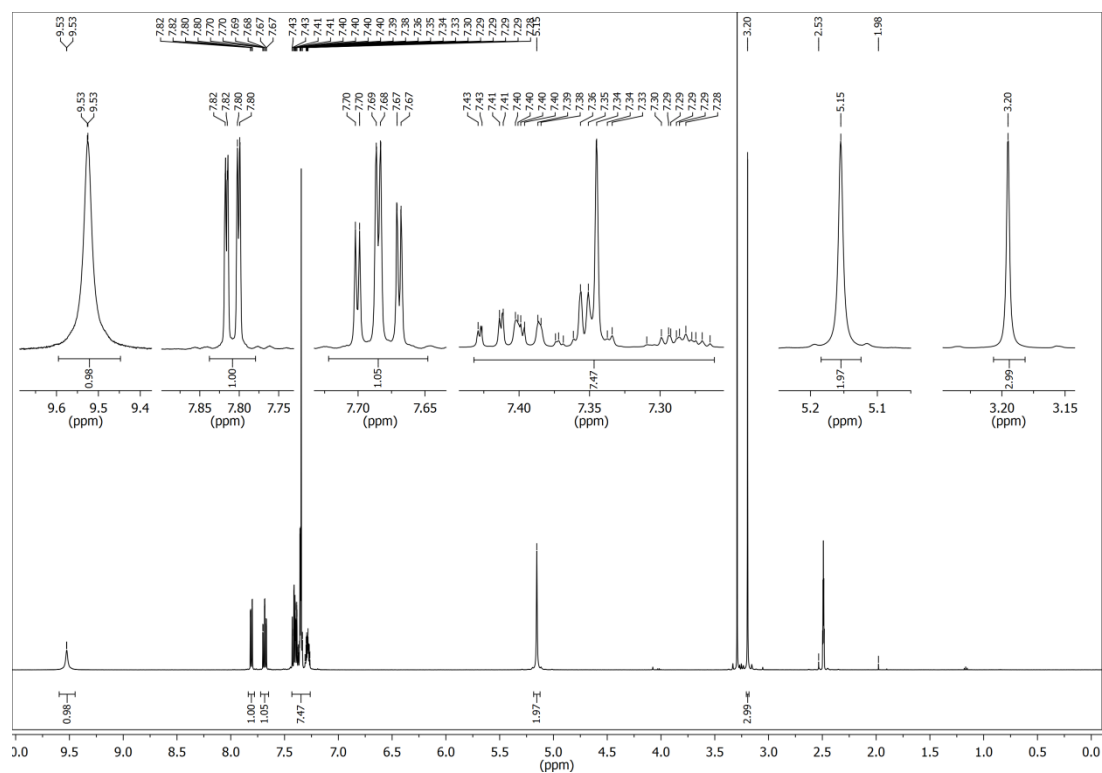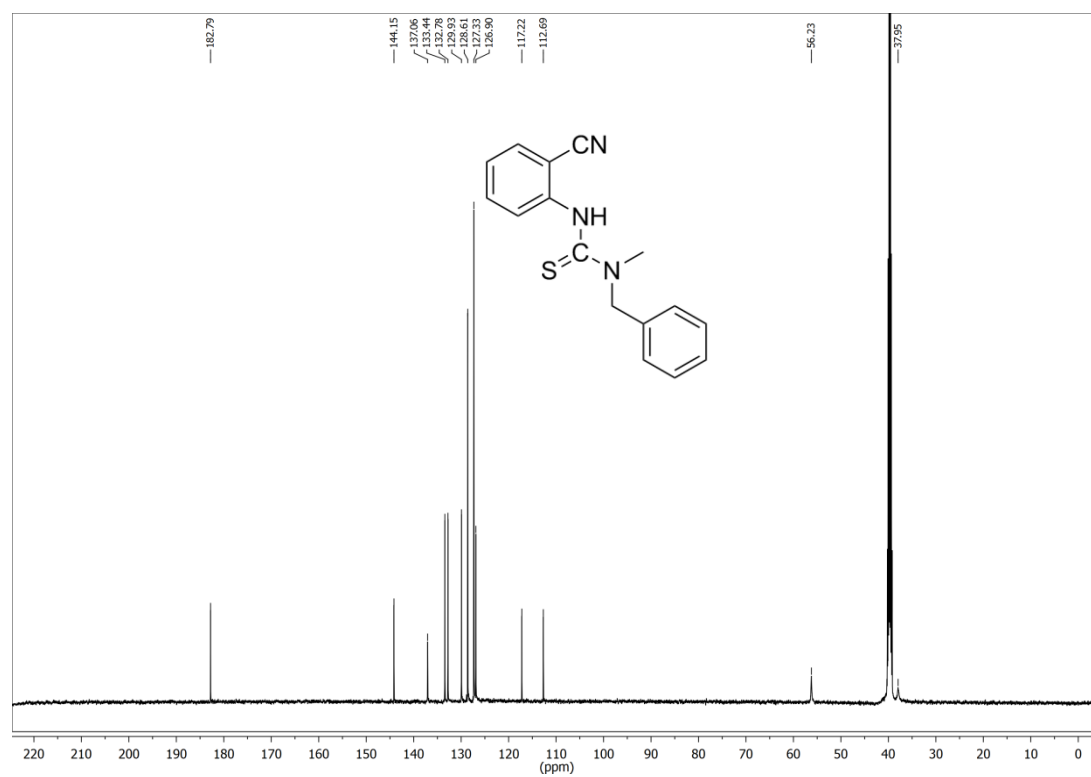

***N*-(2-Cyanophenyl)phenylcarbamate, DMSO-*d*<sub>6</sub>**

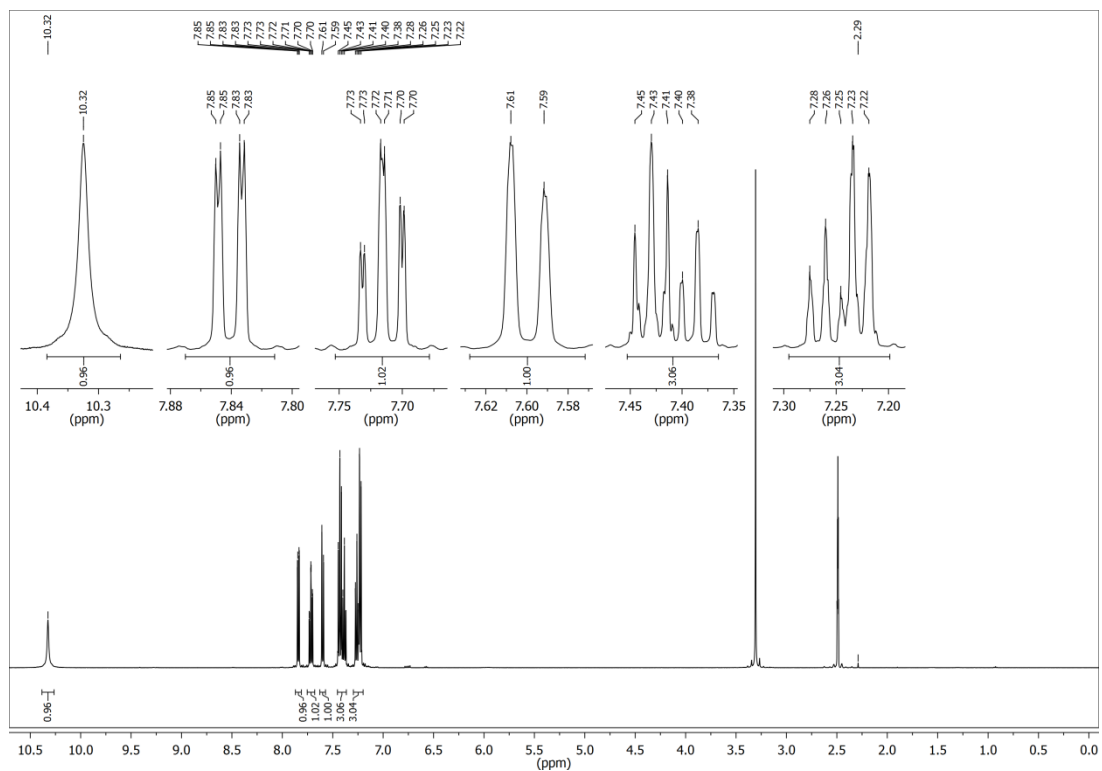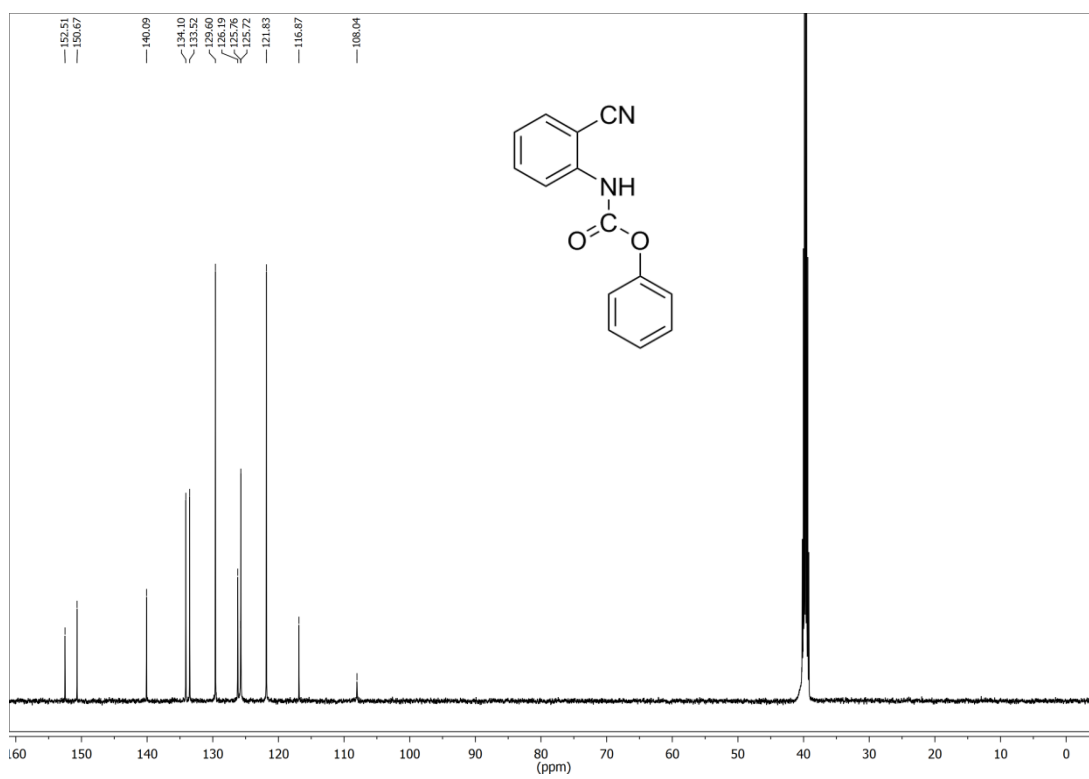

2-(3-Diethylureido)benzonitrile (2a), DMSO-*d*<sub>6</sub>

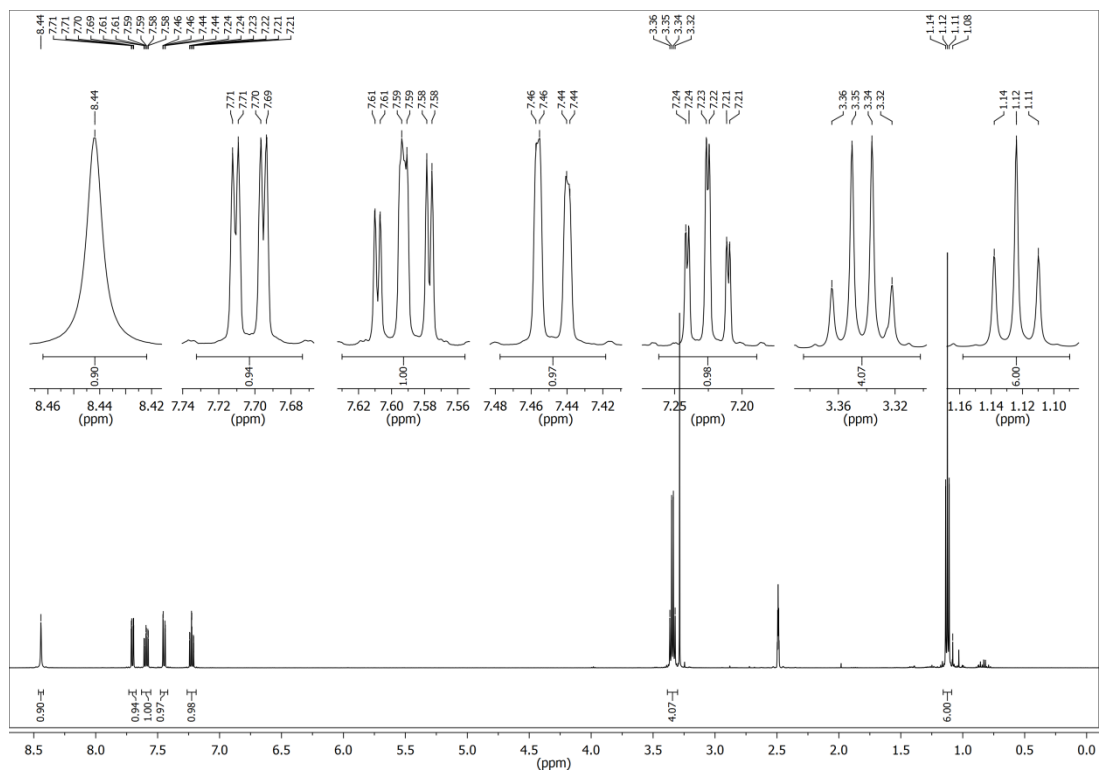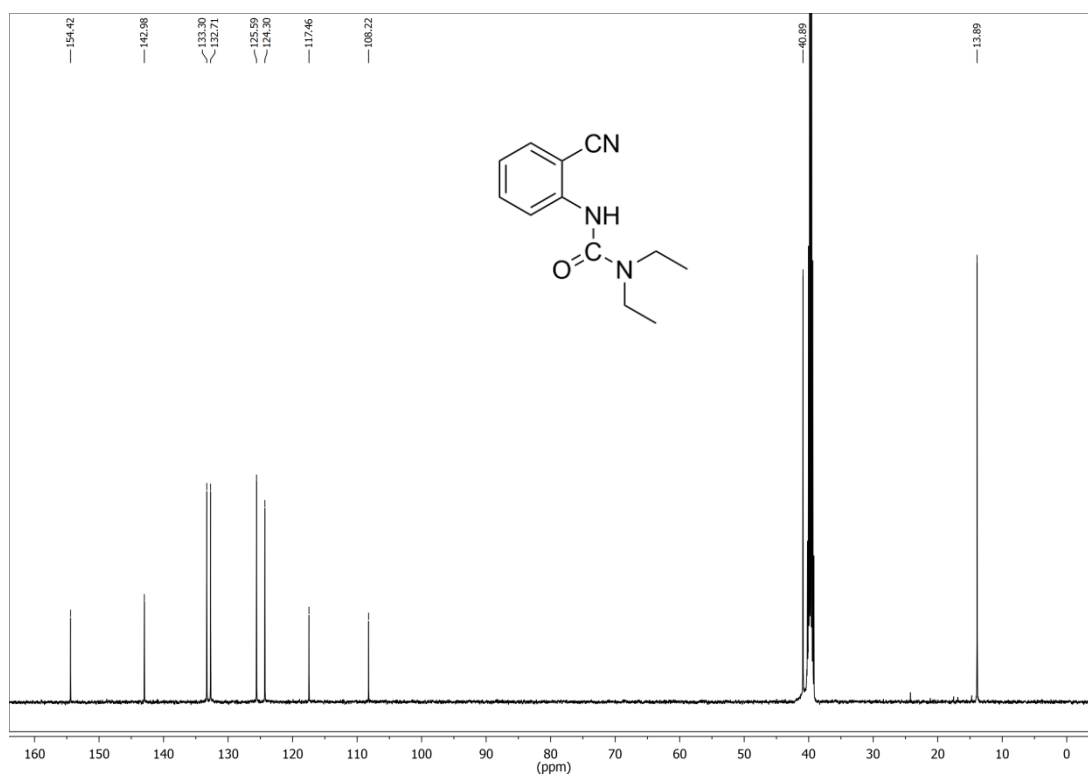



2-(Morpholinothiocarbonylamino)benzonitrile (2b), DMSO-*d*<sub>6</sub>

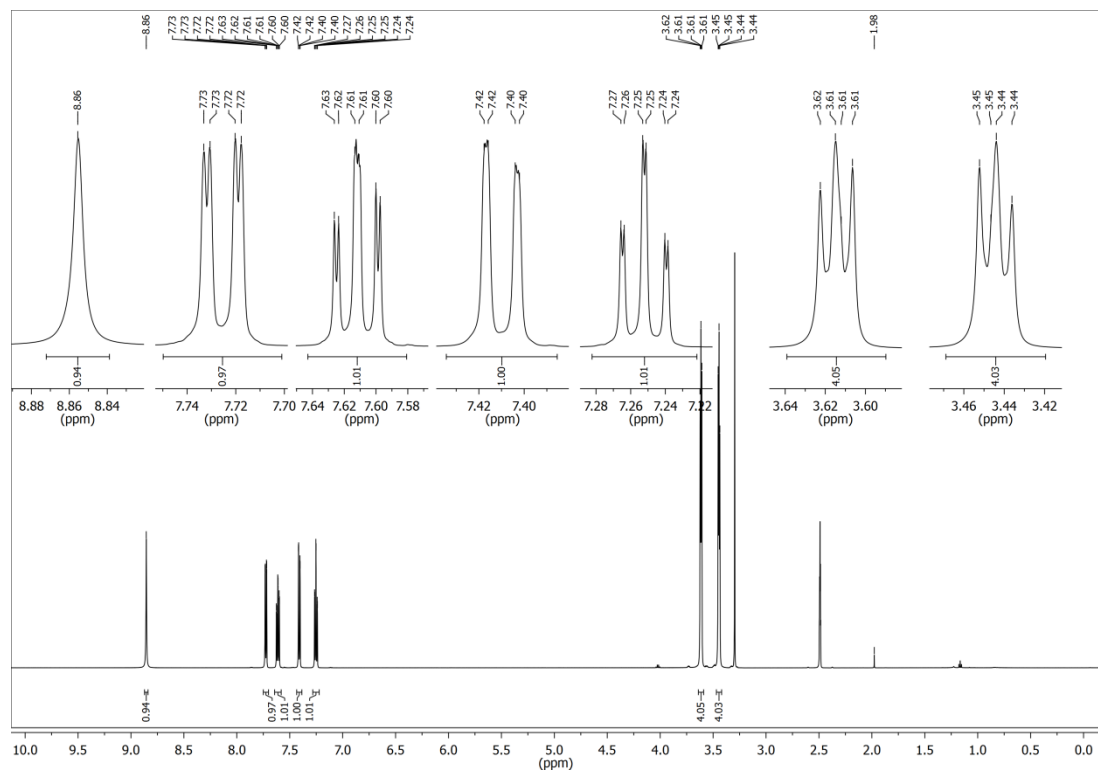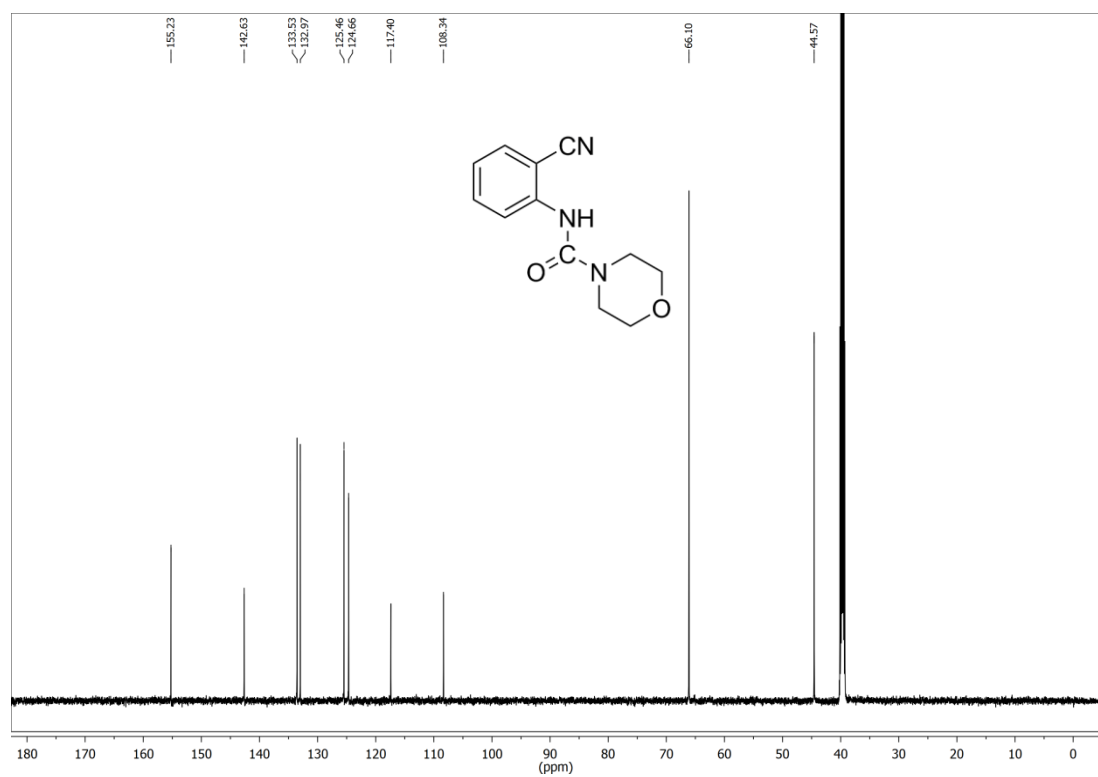

2-(3-Benzyl-3-methylureido)benzonitrile (2c), DMSO-*d*<sub>6</sub>

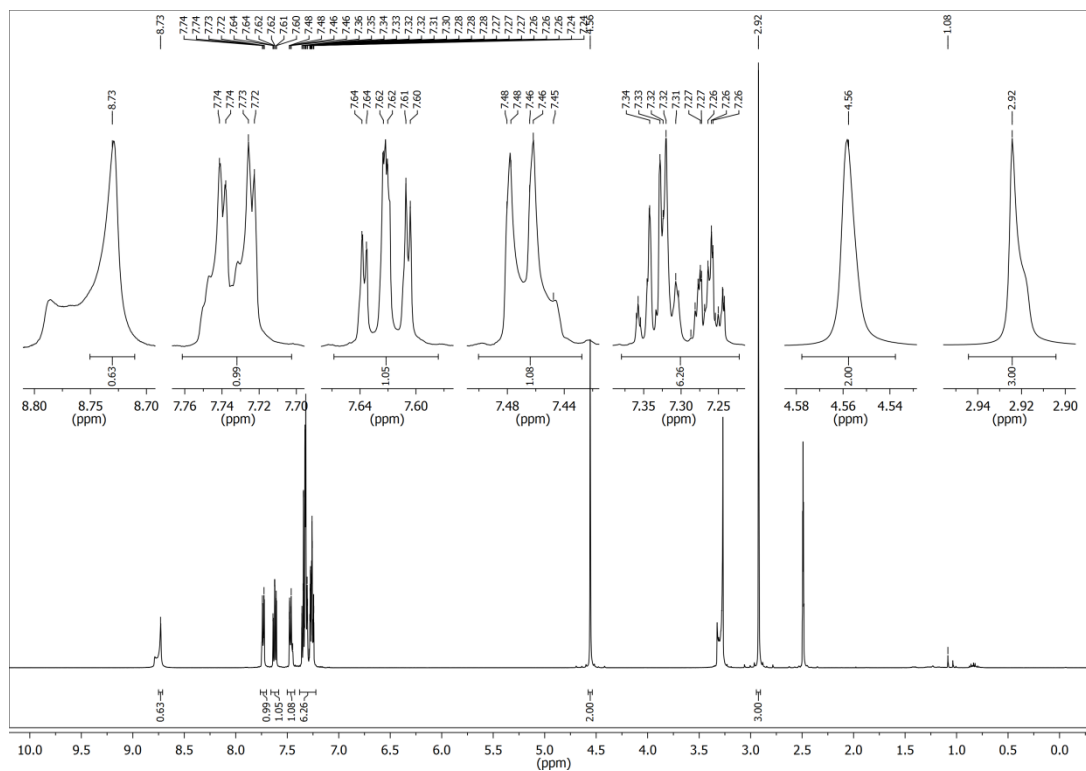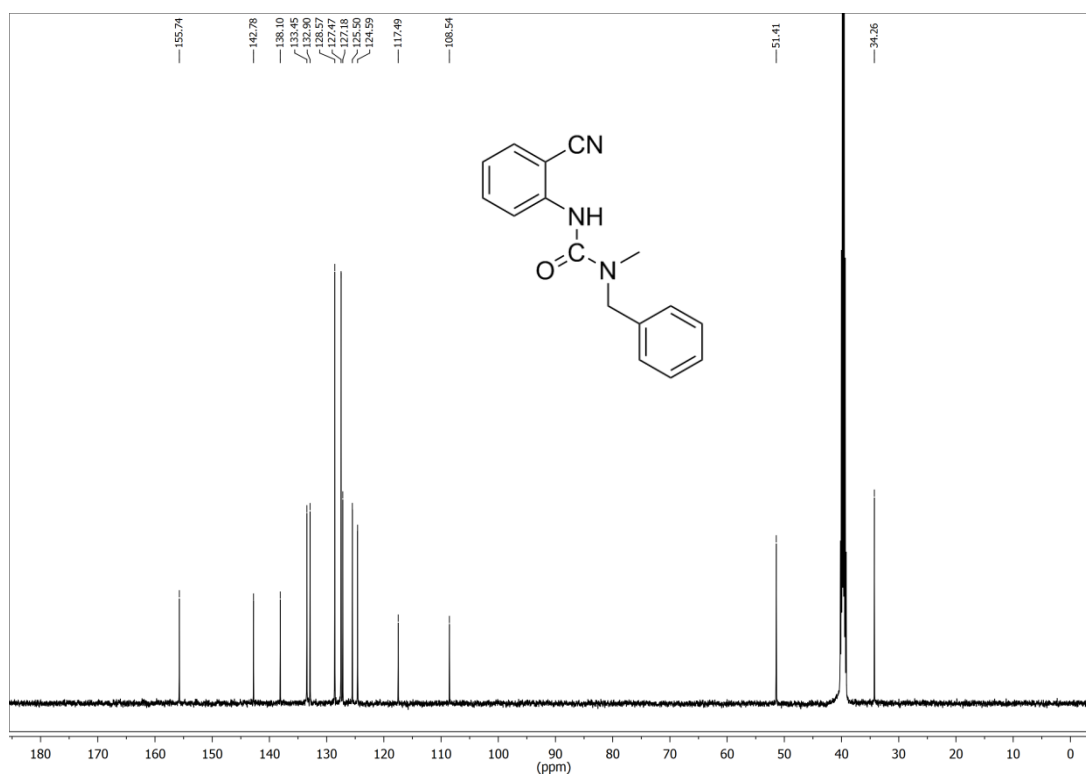

**2-(Diethylamino)-4H-3,1-benzoxazin-4-one (8a), DMSO-*d*<sub>6</sub>**

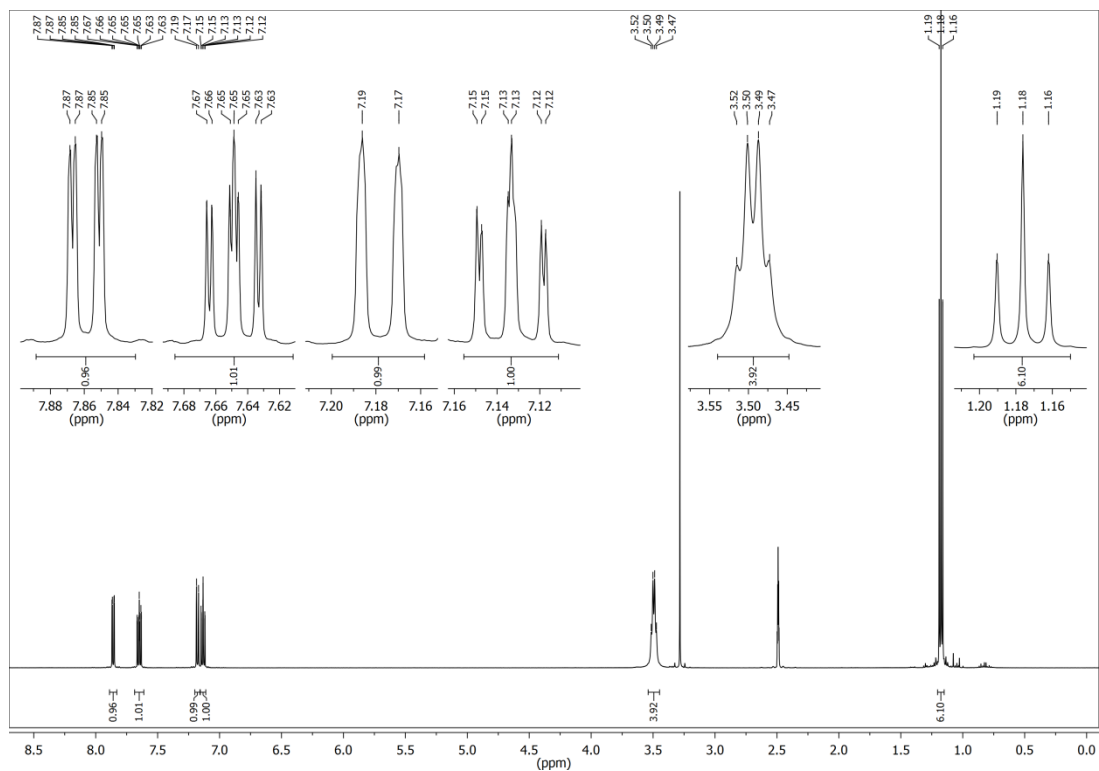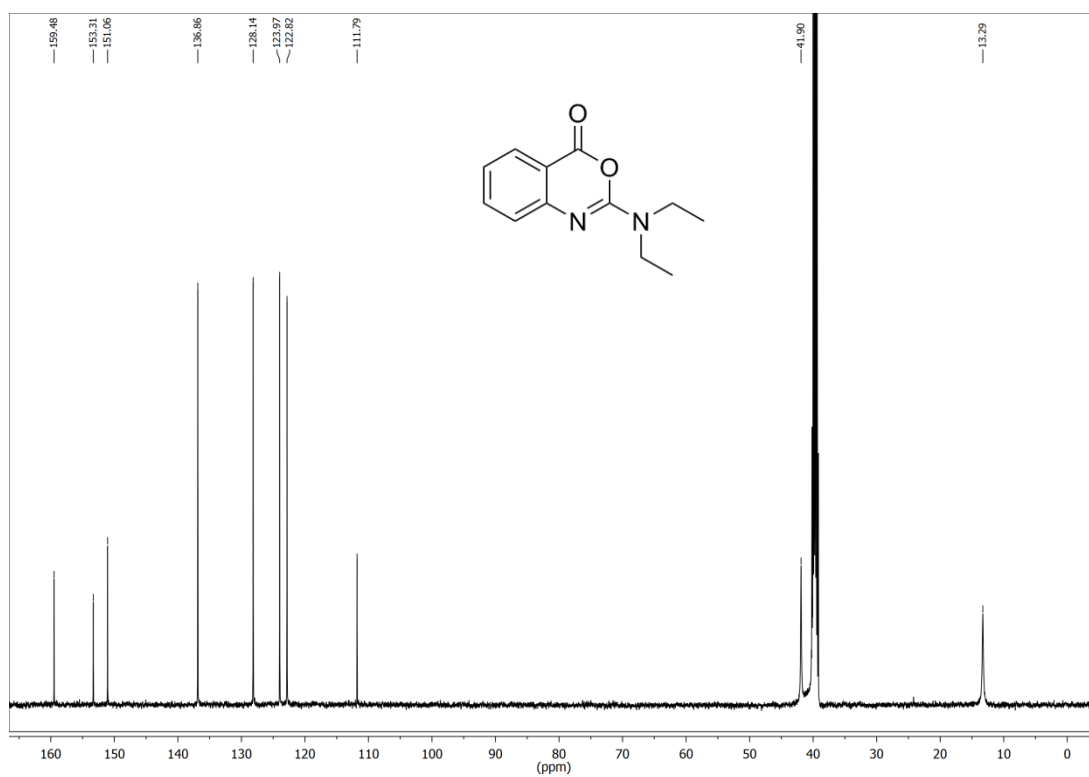

**2-(Morpholino)-4H-3,1-benzoxazin-4-one (8b), DMSO-*d*<sub>6</sub>**

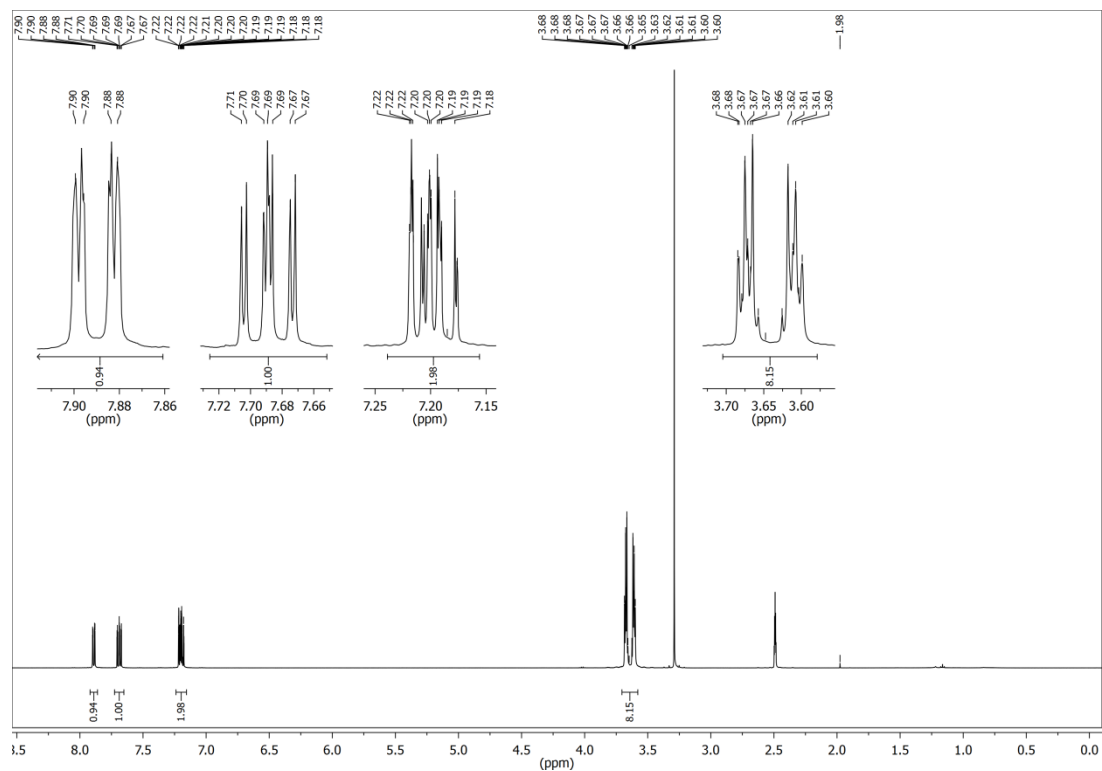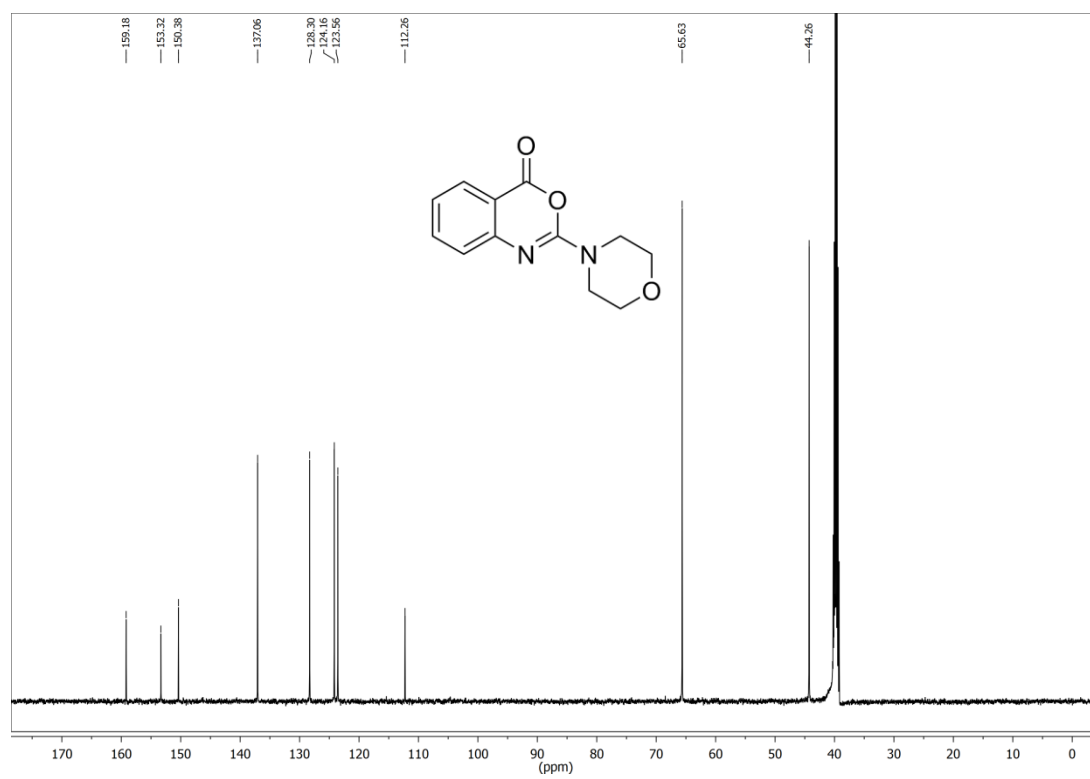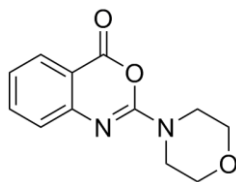

2-[N-Benzyl(methylamino)]-4H-3,1-benzoxazin-4-one (8c), DMSO-*d*<sub>6</sub>

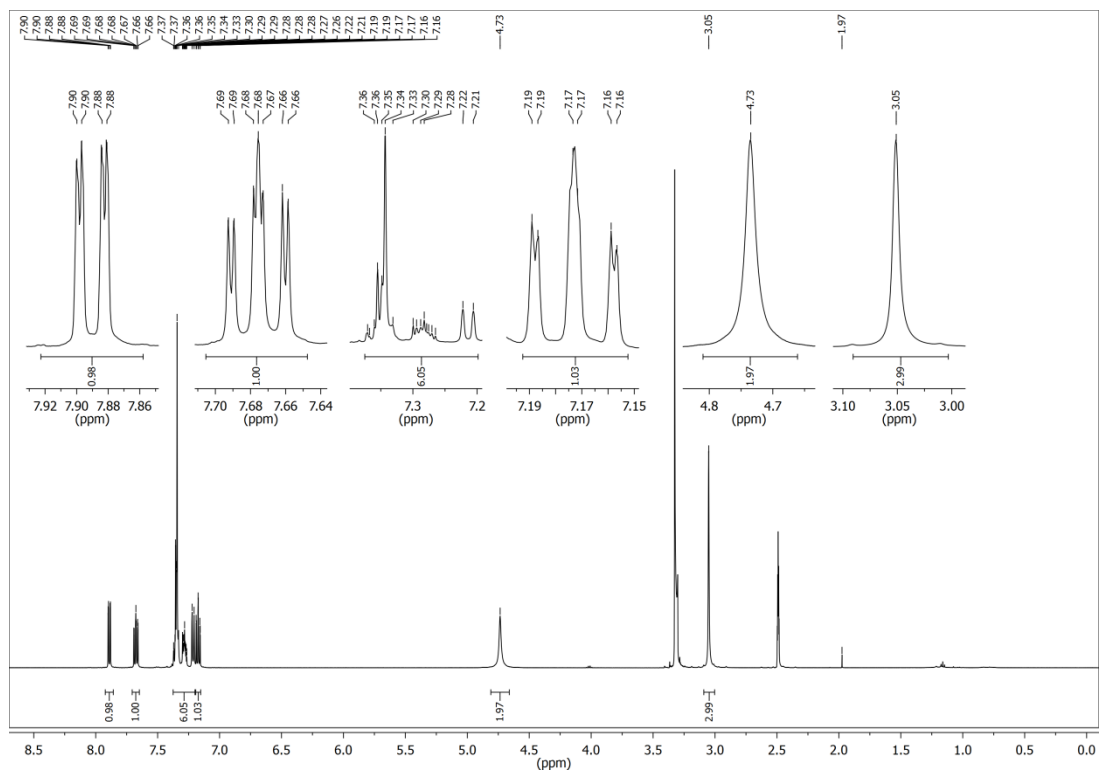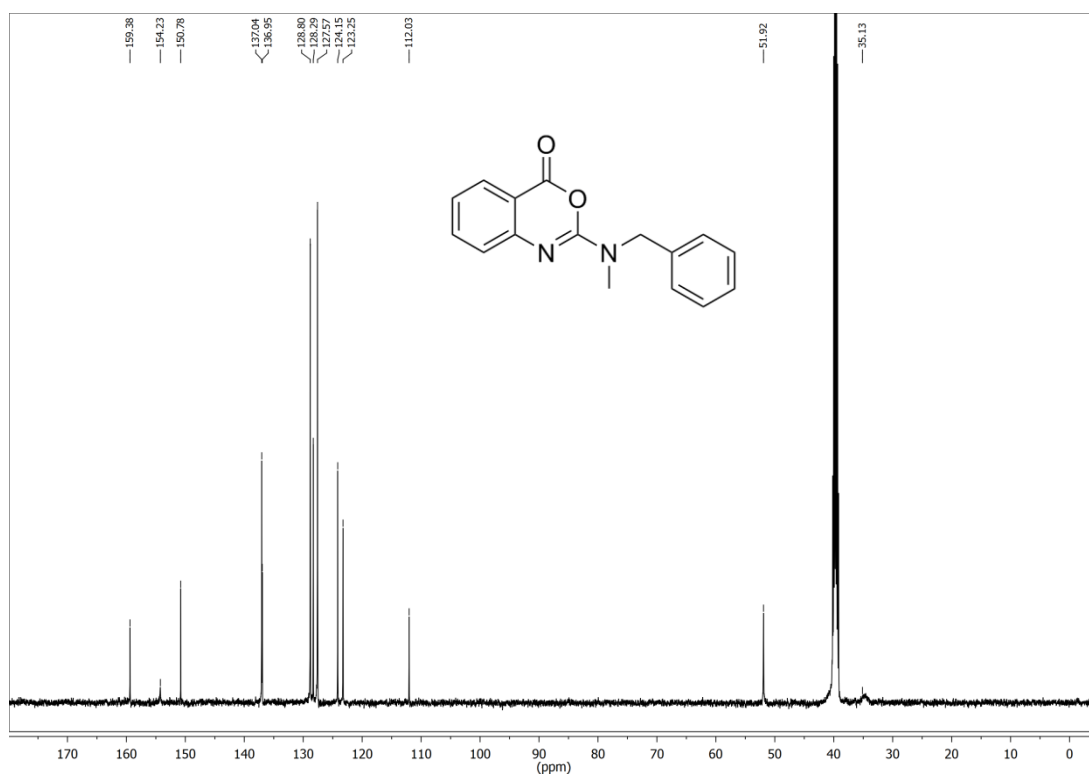

**4-Acetylimino-2-diethylamino-4H-3,1-benzothiazine (11a), DMSO-*d*<sub>6</sub>**

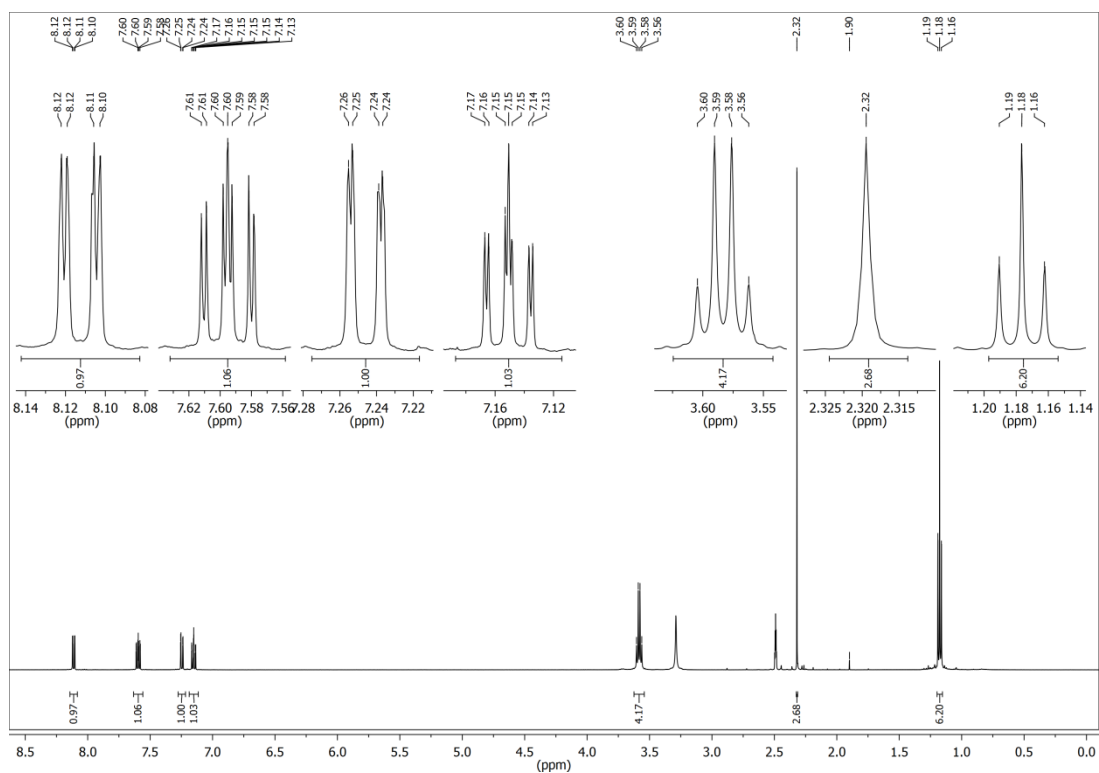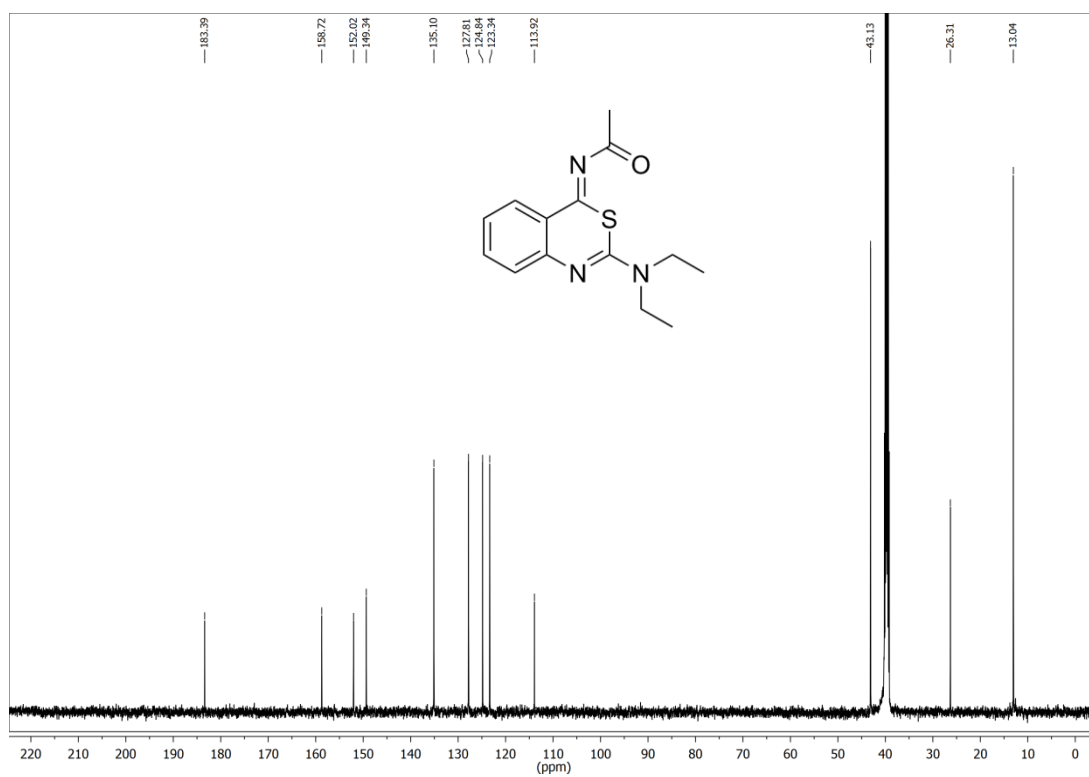

**4-Acetylimino-2-morpholino-4*H*-3,1-benzothiazine (11b), DMSO-*d*<sub>6</sub>**

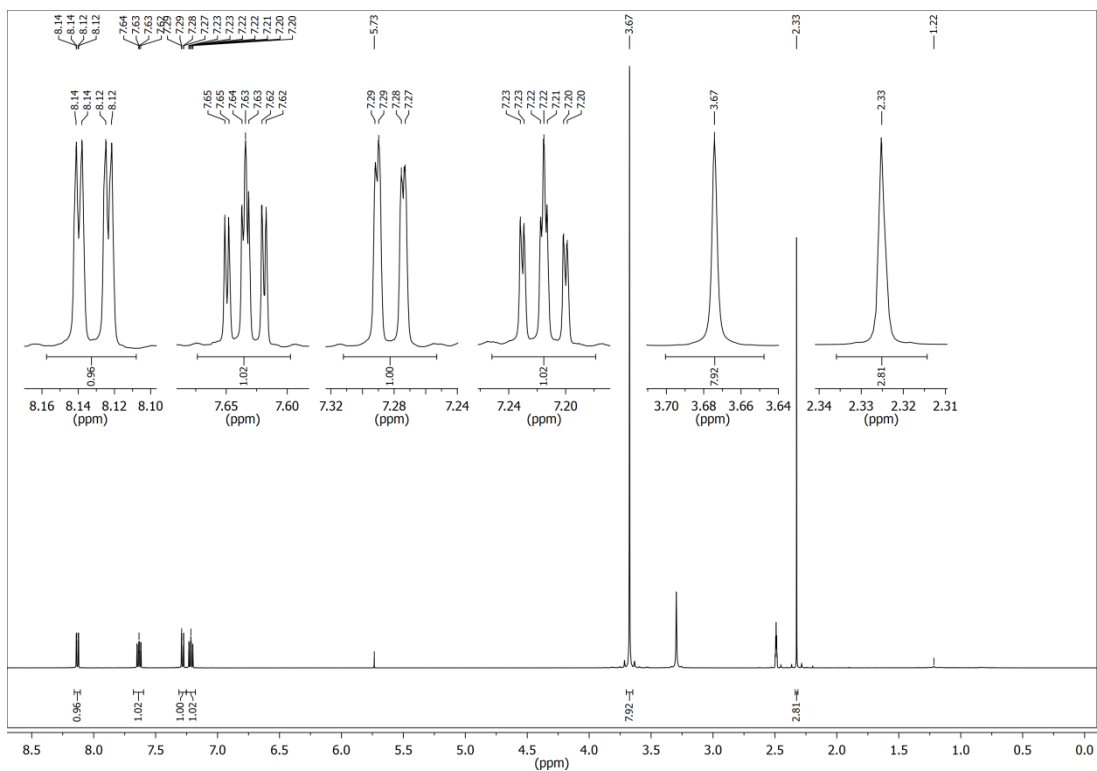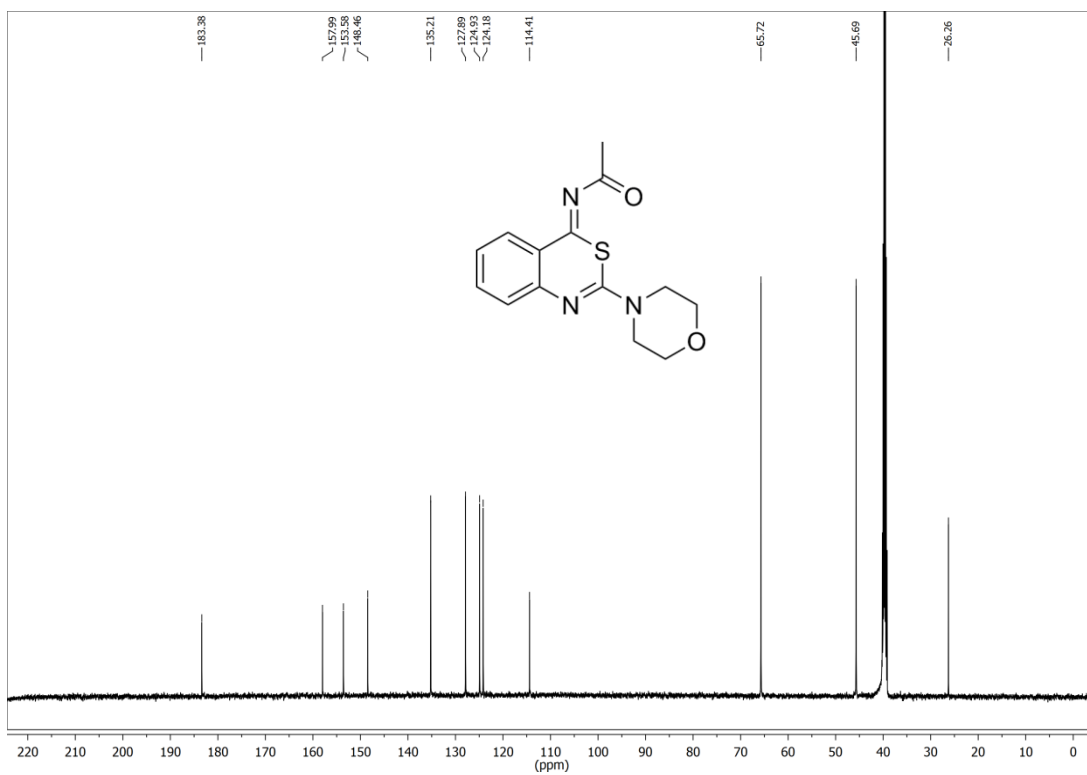

**4-Acetylimino-2-benzylmethylamino-4H-3,1-benzothiazine (11c), DMSO-*d*<sub>6</sub>**

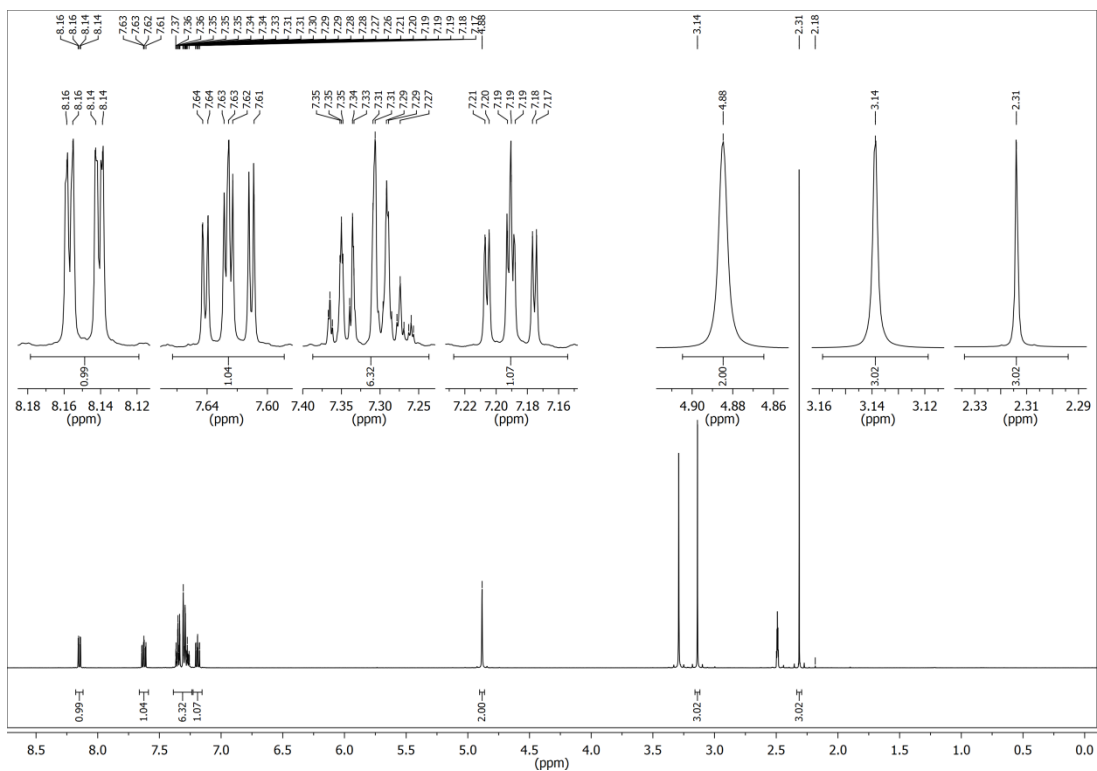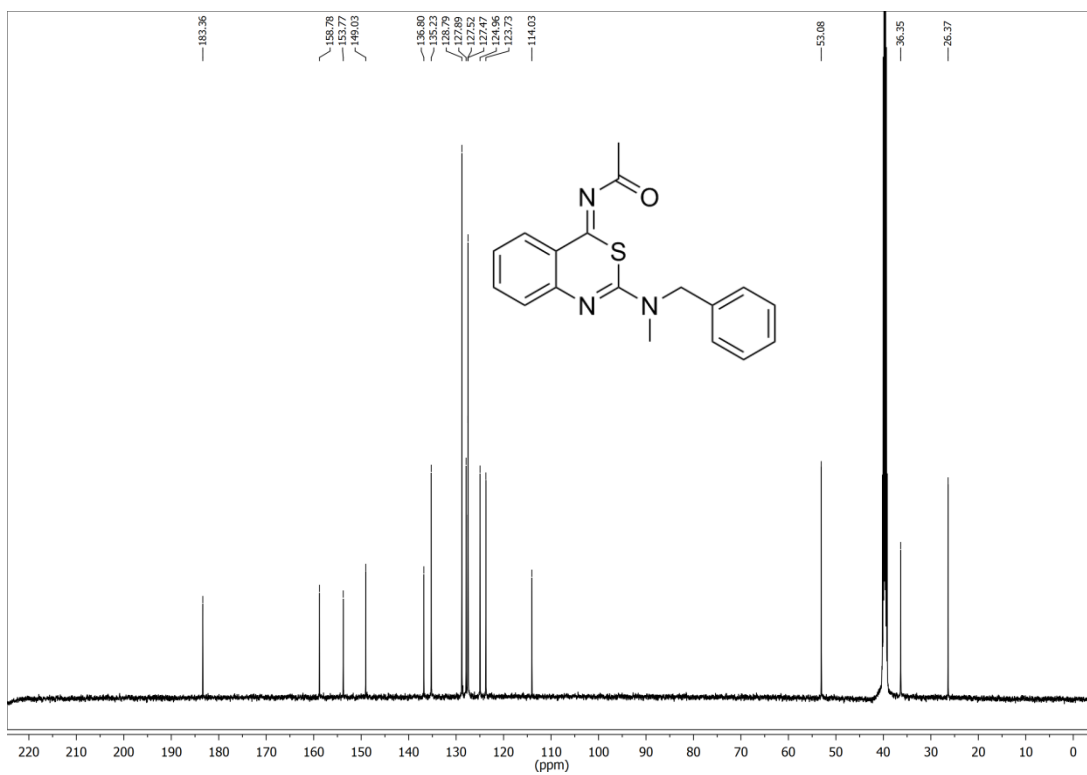



2-Diethylamino-4-propionylimino-4H-3,1-benzothiazine (12a), DMSO-*d*<sub>6</sub>

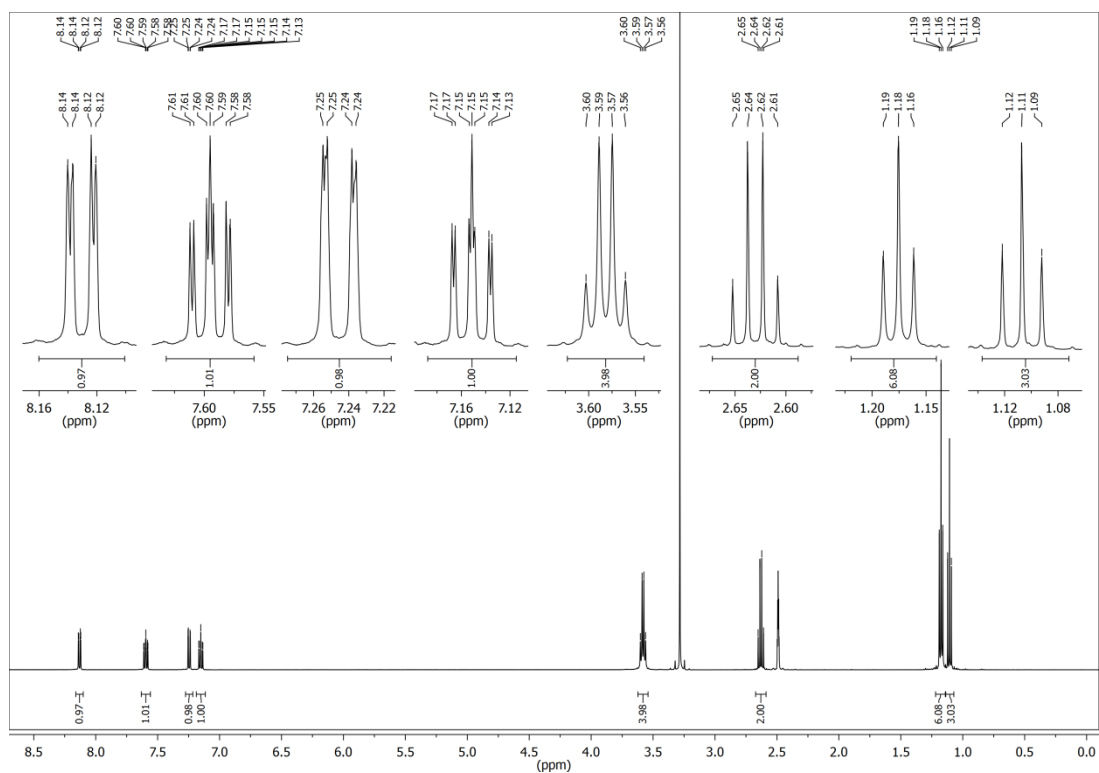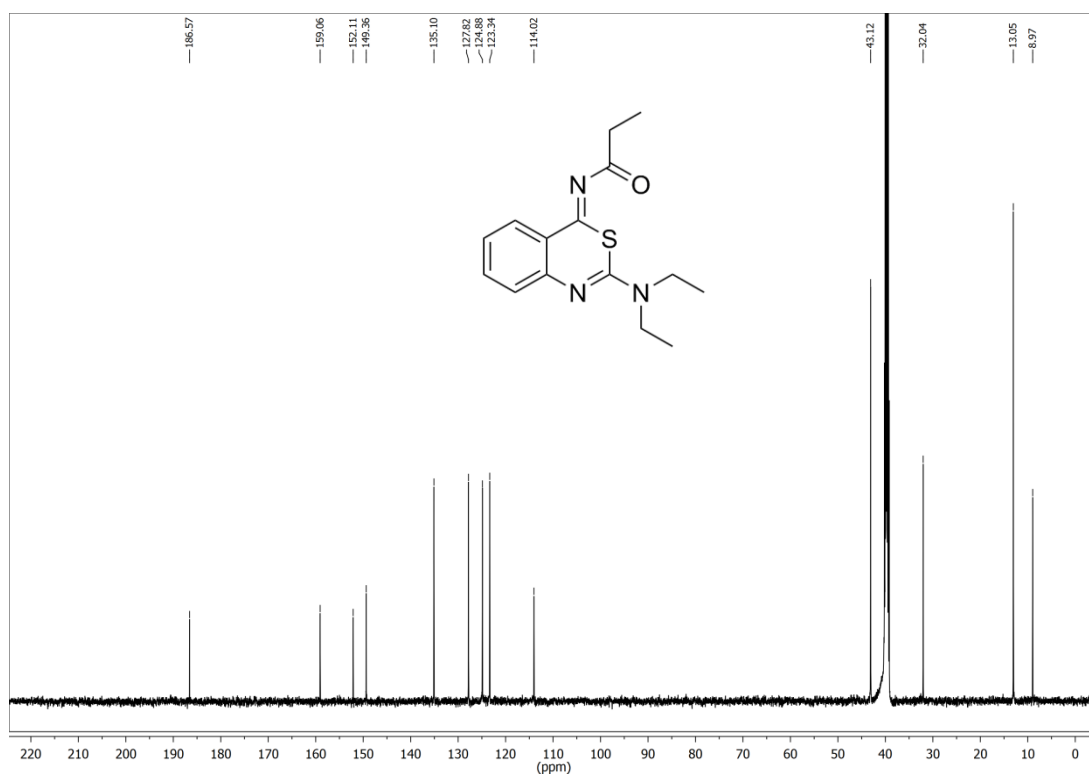

**2-Morpholino-4-propionylimino-4H-3,1-benzothiazine (12b), DMSO-*d*<sub>6</sub>**

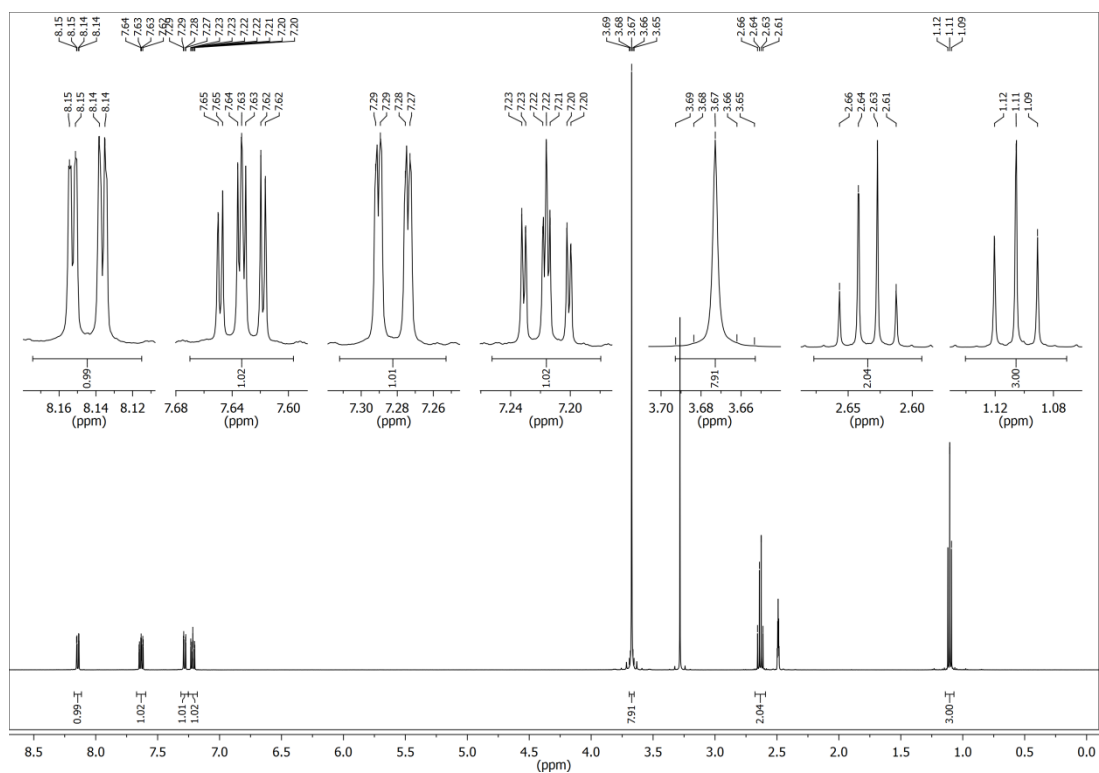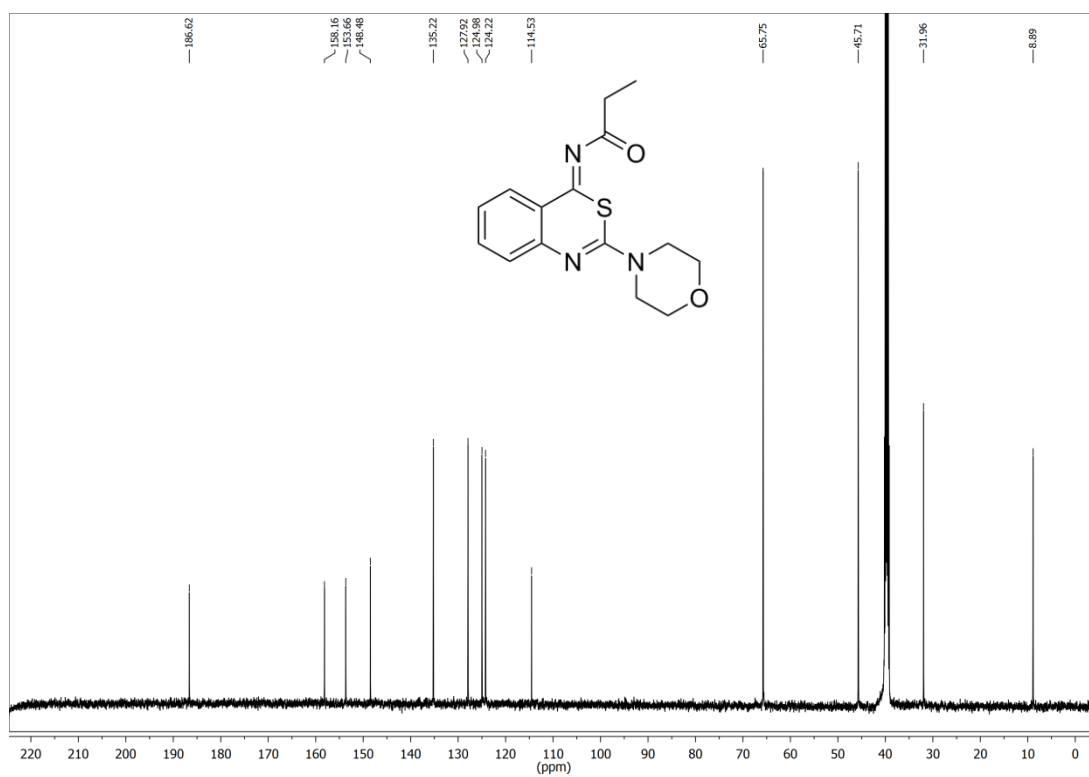

**2-Benzylmethylamino-4-propionylimino-4H-3,1-benzothiazine (12c), DMSO-*d*<sub>6</sub>**

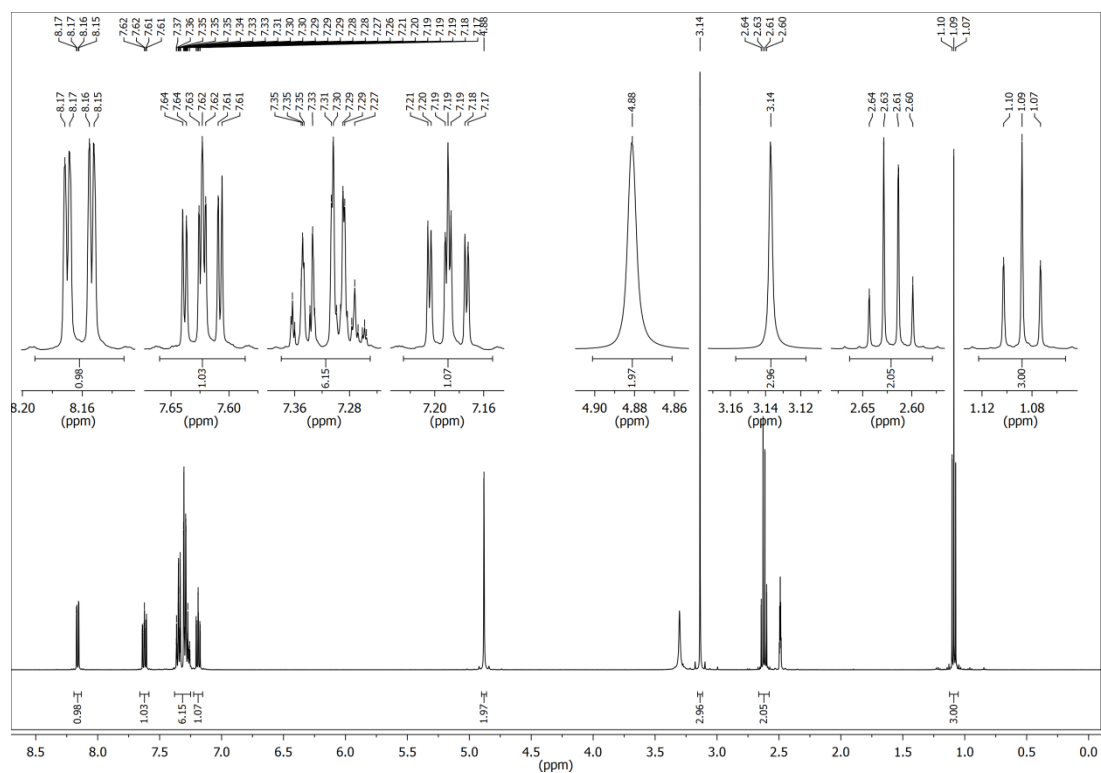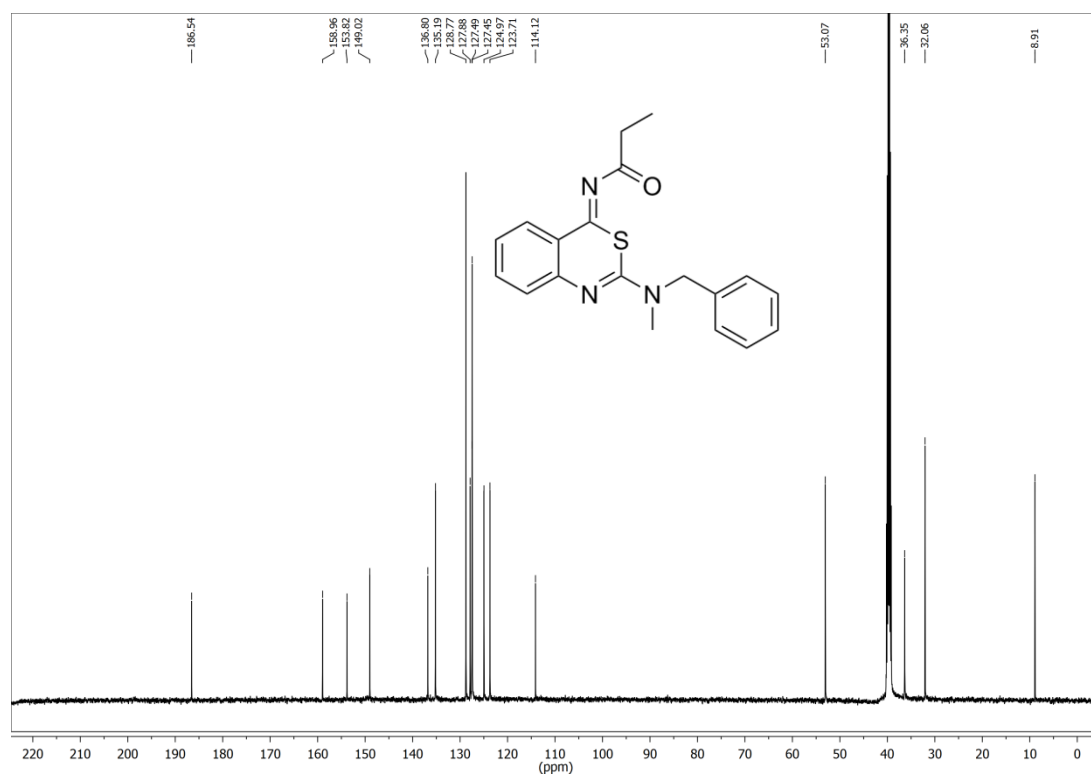

**2-Diethylamino-4-isobutyrylimino-4H-3,1-benzothiazine (13a), DMSO-*d*<sub>6</sub>**

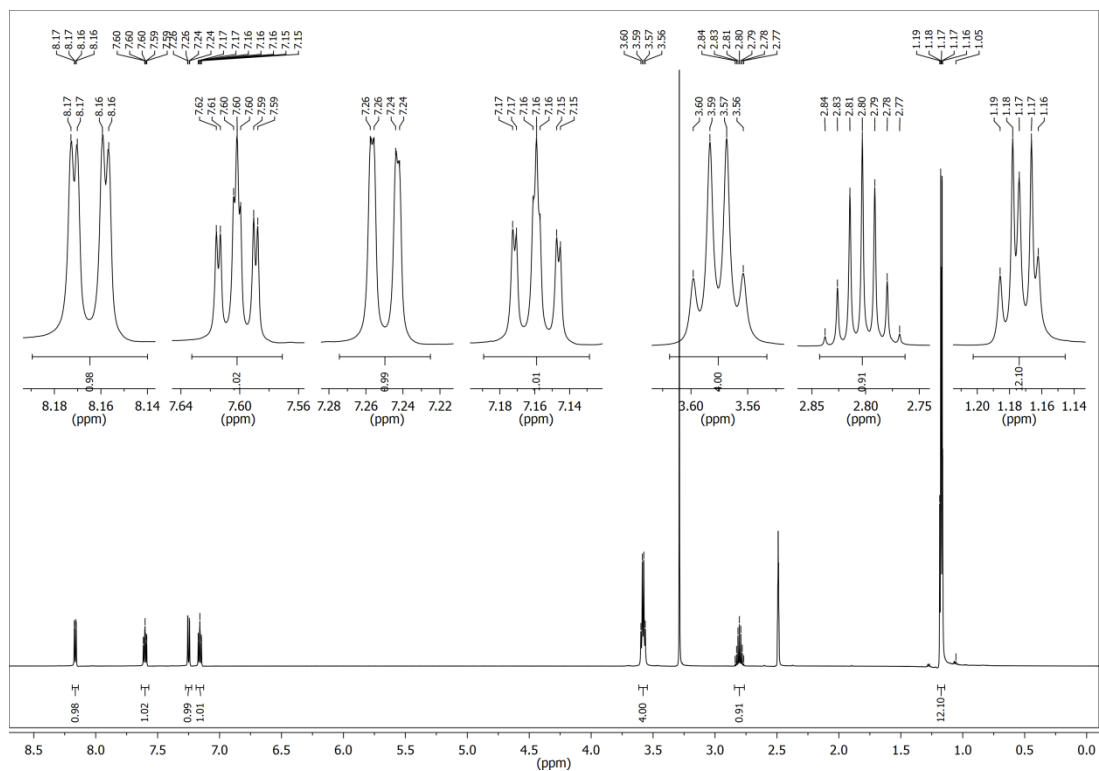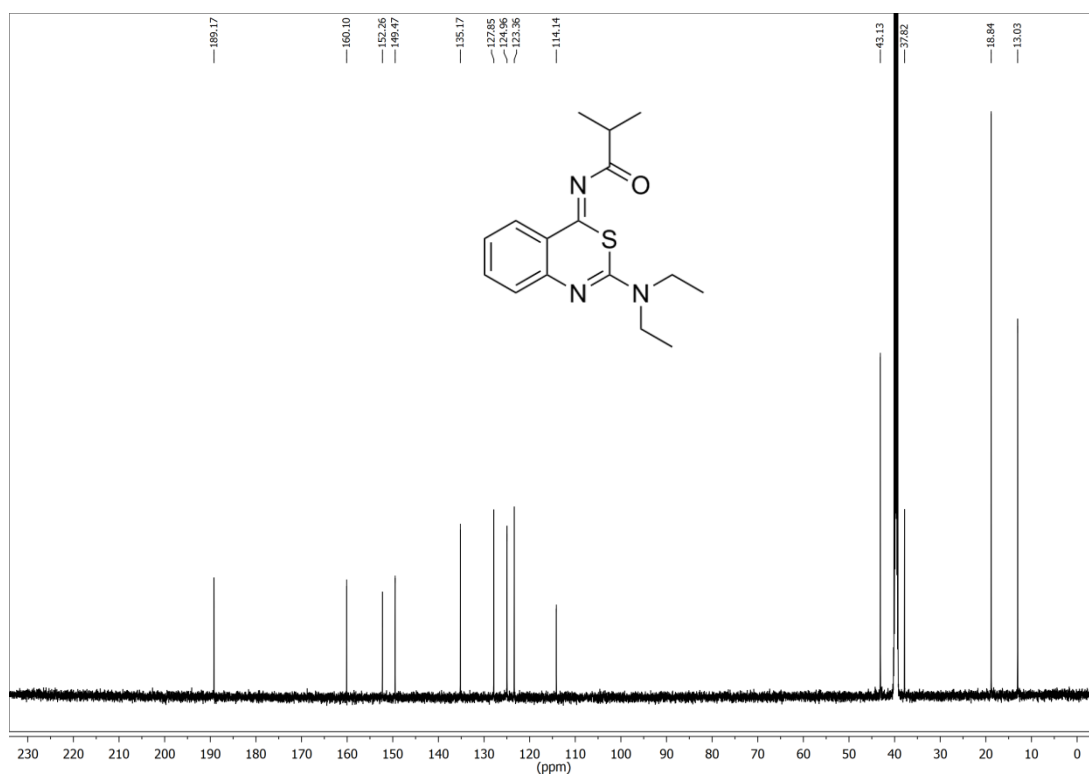

#### 4-Isobutyrylimino-2-morpholino-4*H*-3,1-benzothiazine (13b), DMSO-*d*<sub>6</sub>

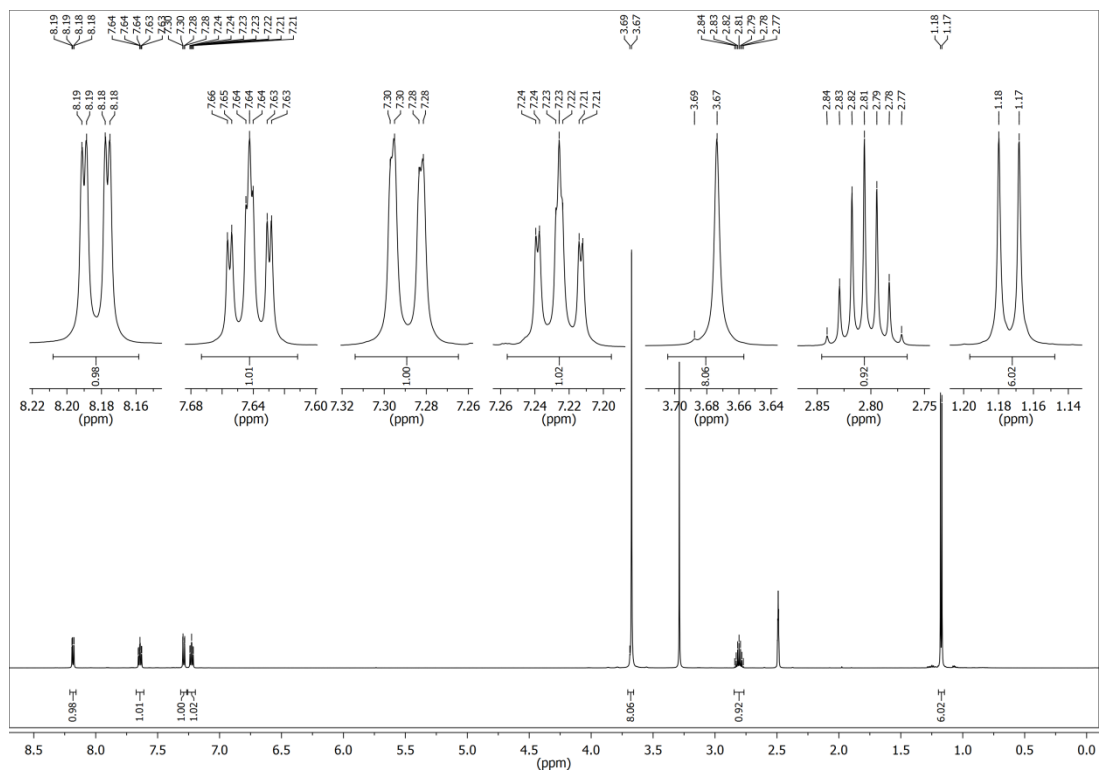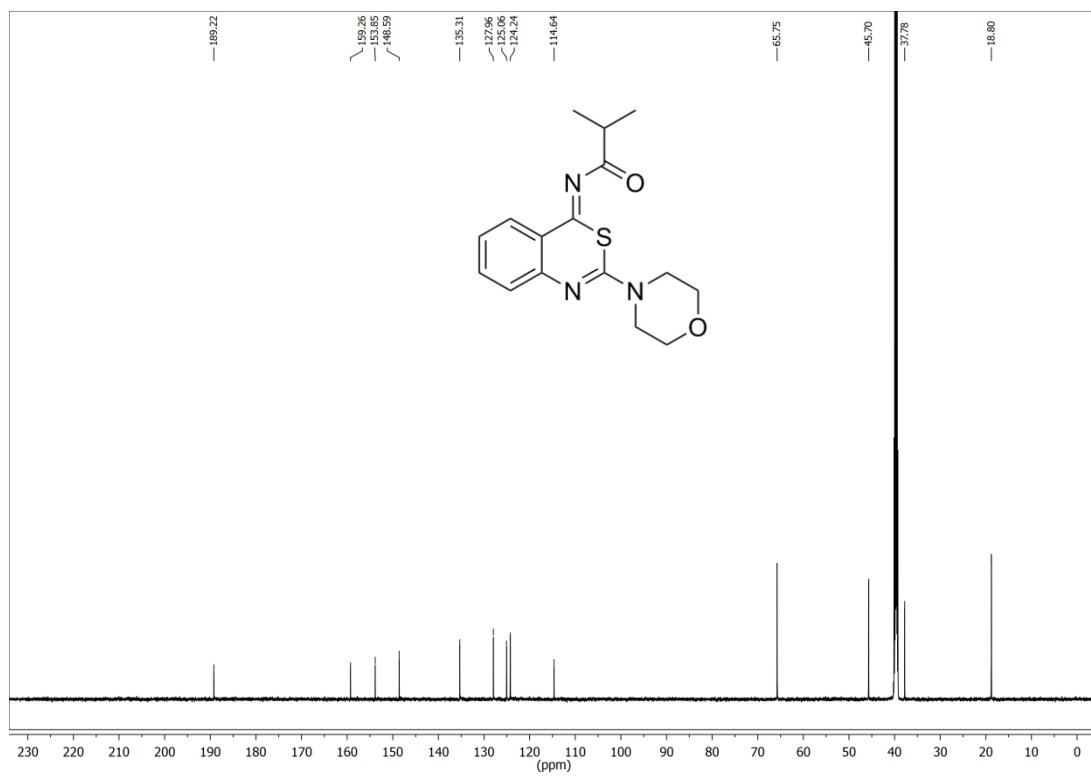

**2-Benzylmethylamino-4-isobutyrylimino-4H-3,1-benzothiazine (13c), DMSO-*d*<sub>6</sub>**

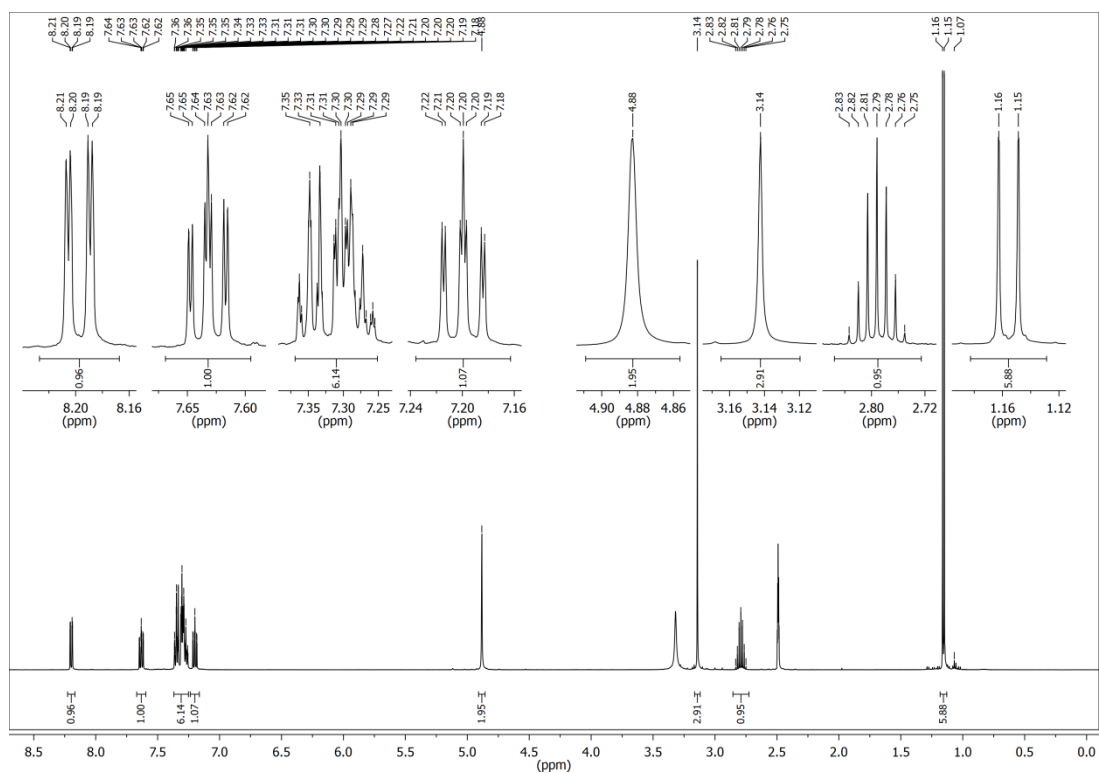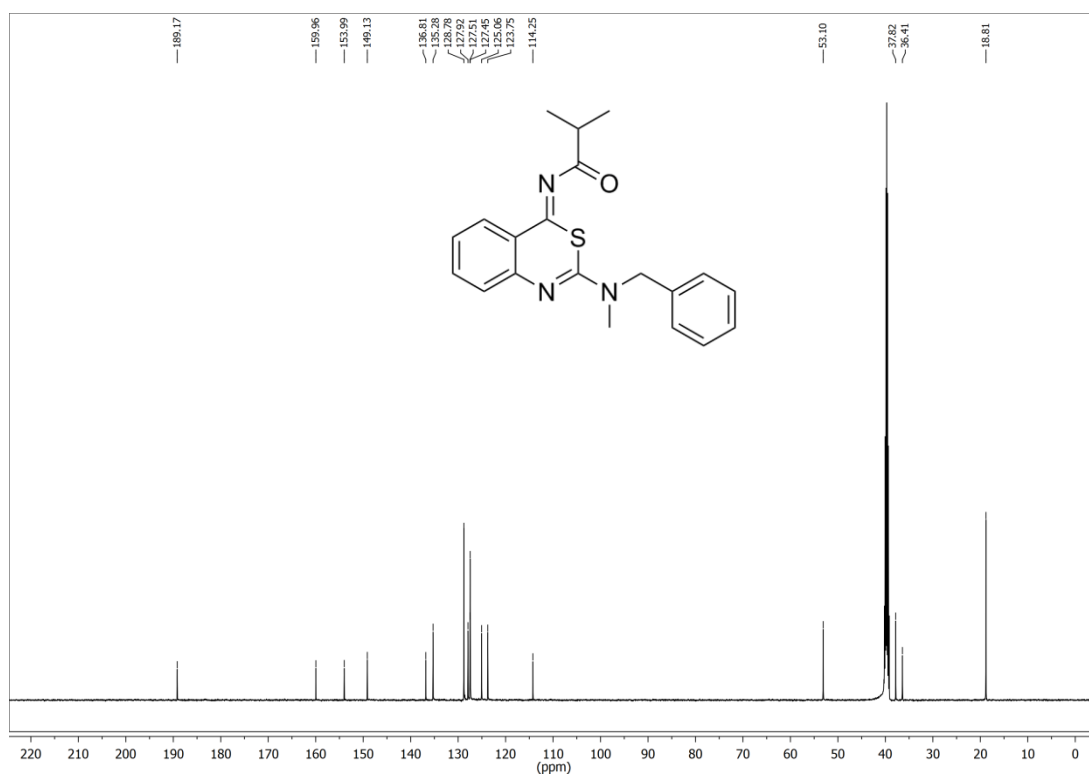

**2-Diethylamino-4-(3-methylbutyrylimino)-4H-3,1-benzothiazine (14a), DMSO-*d*<sub>6</sub>**

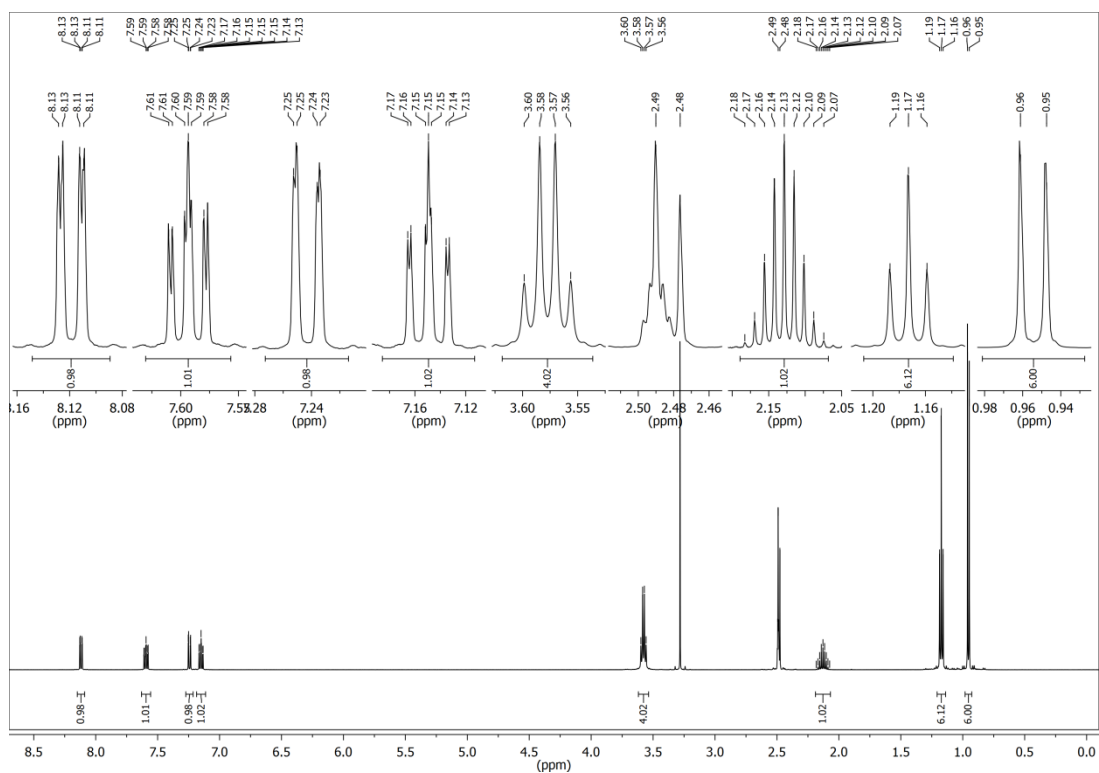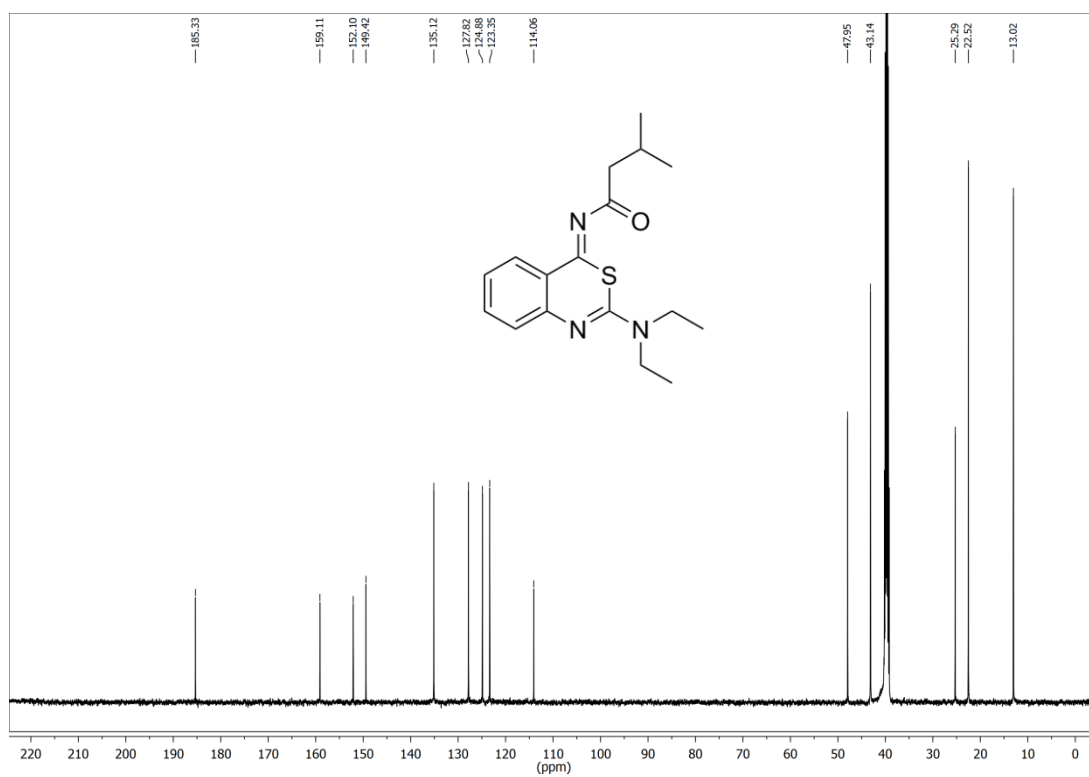





**2-Benzylmethylamino-4-(3-methylbutyrylimino)-4H-3,1-benzothiazine (14c), DMSO-*d*<sub>6</sub>**

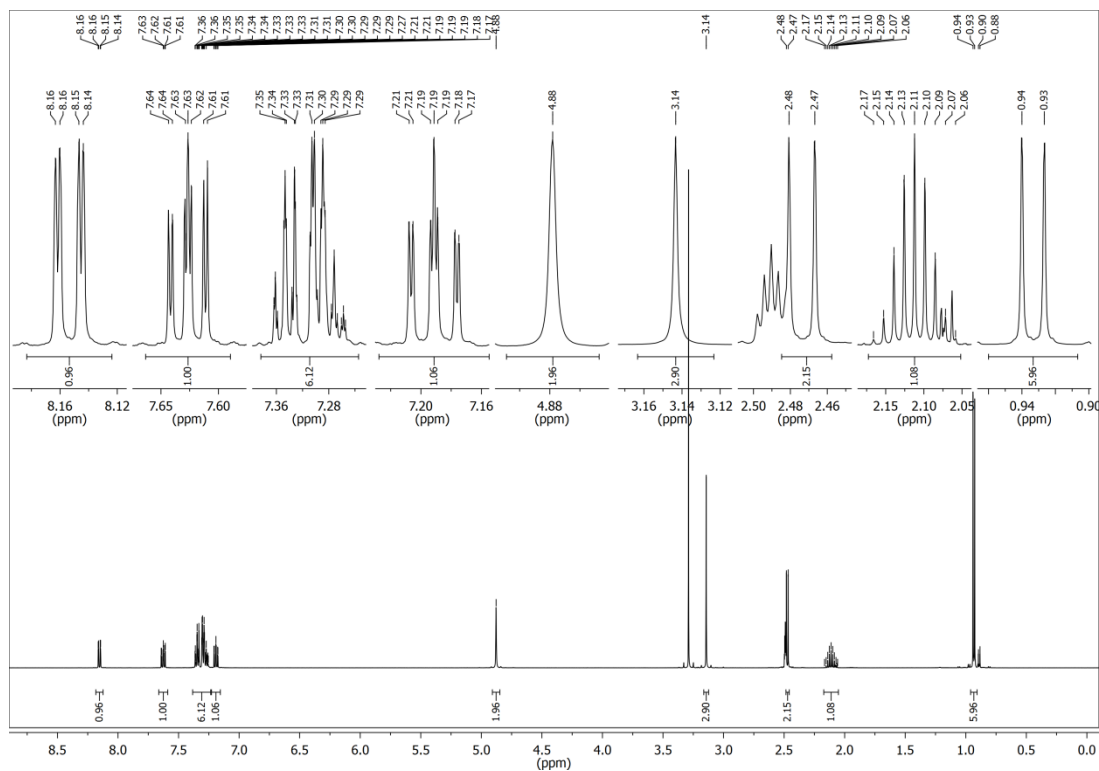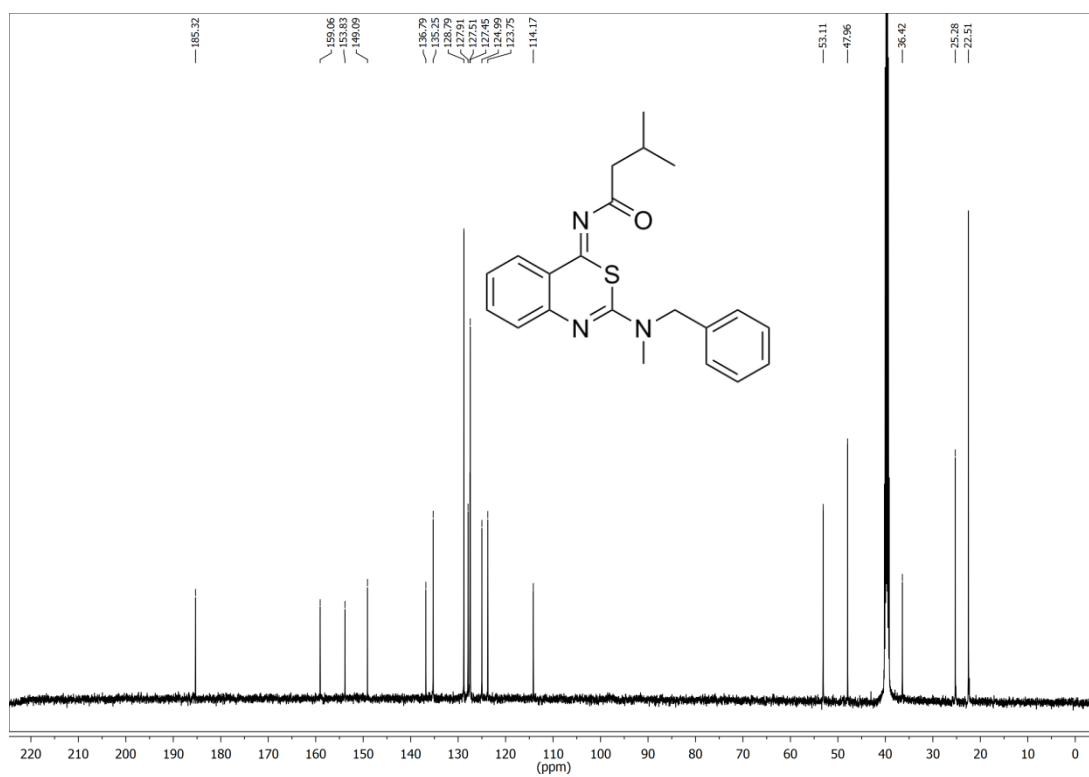

**4-Chloroacetylimino-2-diethylamino-4H-3,1-benzothiazine (15a), DMSO-*d*<sub>6</sub>**

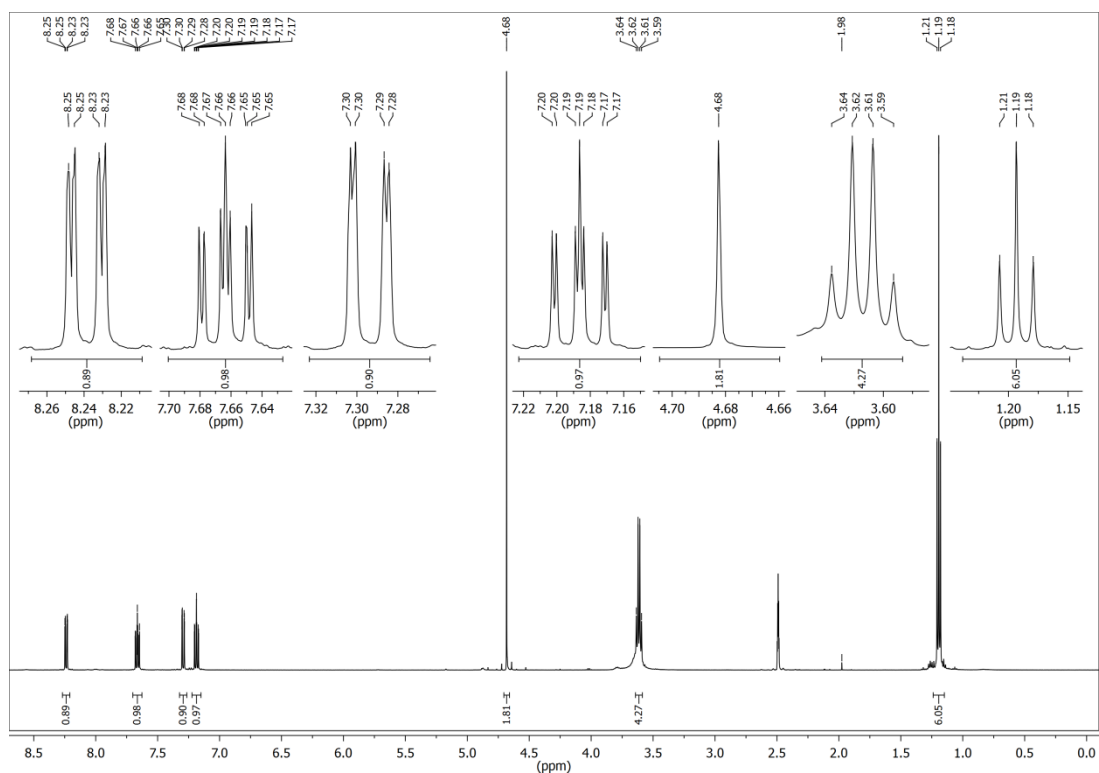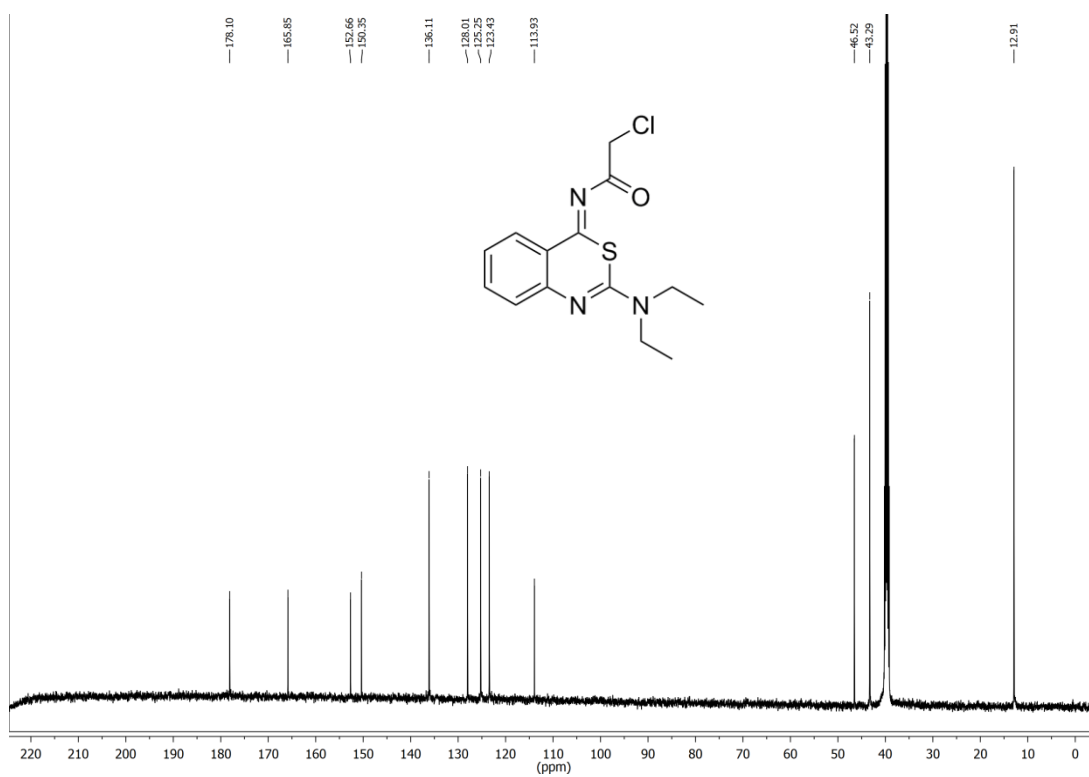

**4-Chloroacetylimino-2-morpholino-4H-3,1-benzothiazine (15b), DMSO-*d*<sub>6</sub>**

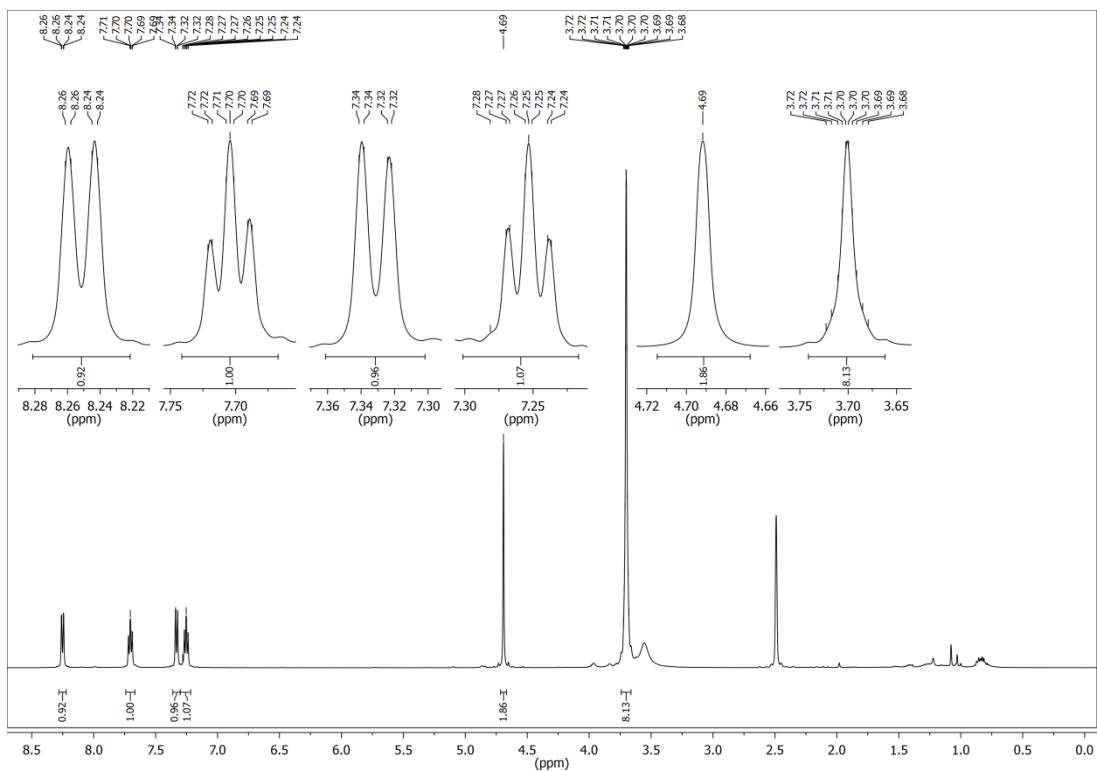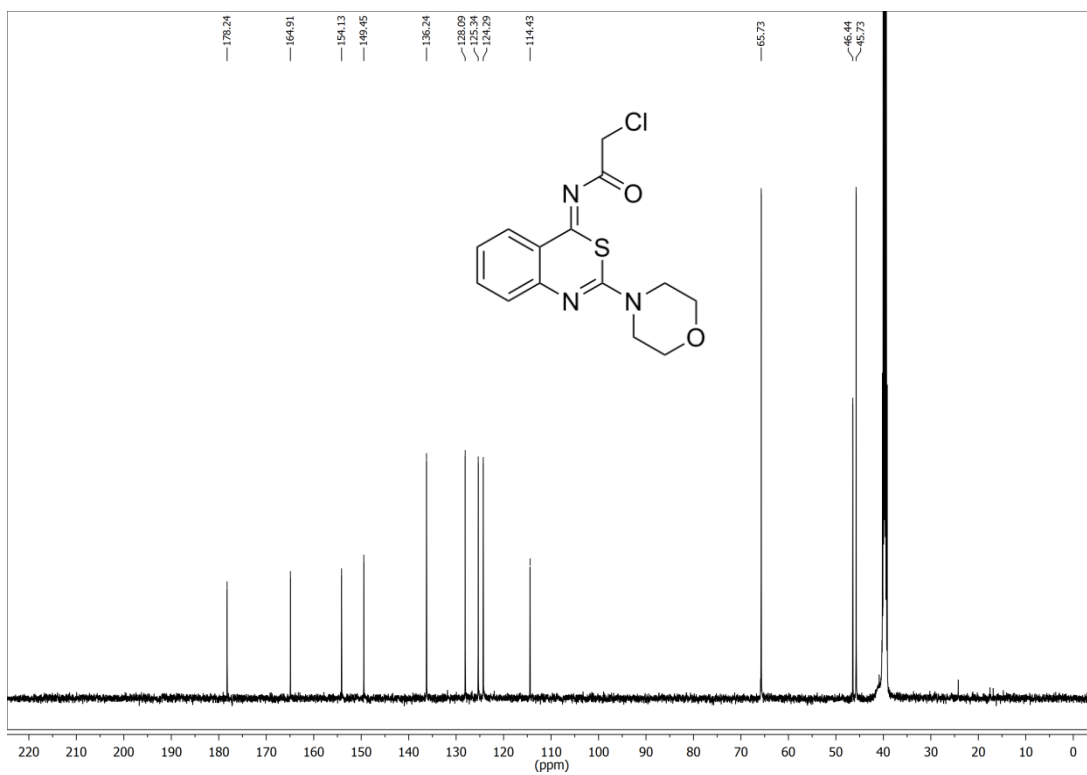

**2-Benzylmethylamino-4-chloroacetylmino-4H-3,1-benzothiazine (15c), DMSO-*d*<sub>6</sub>**

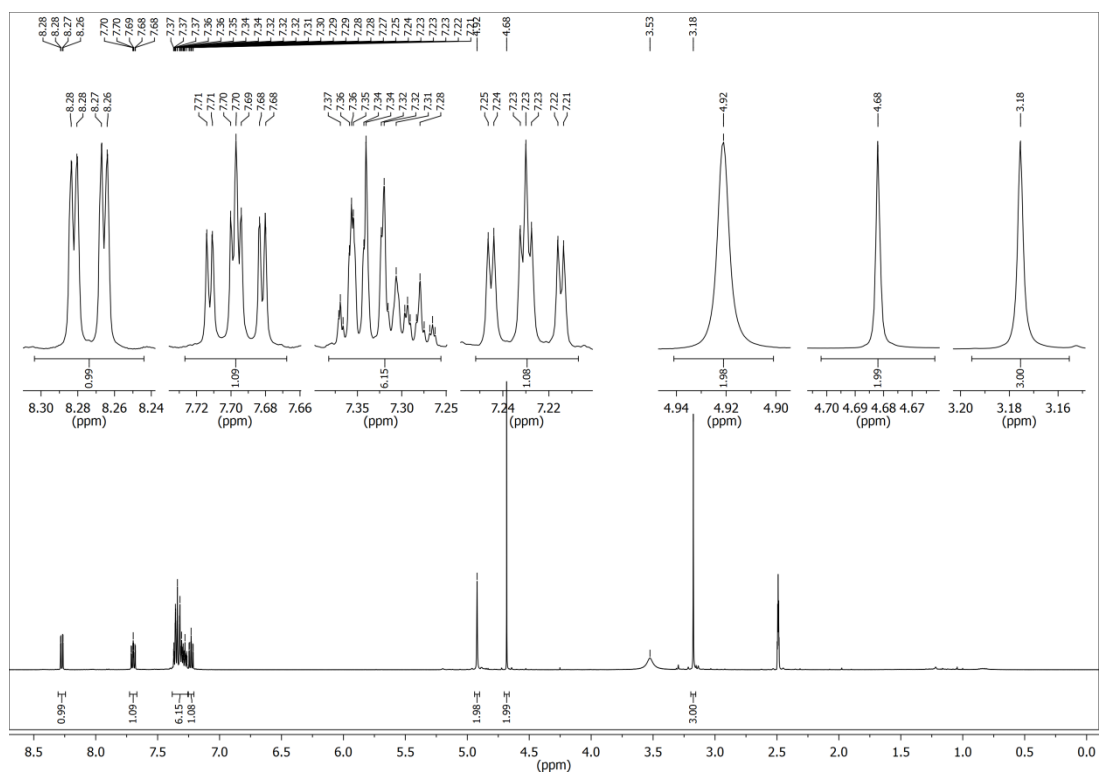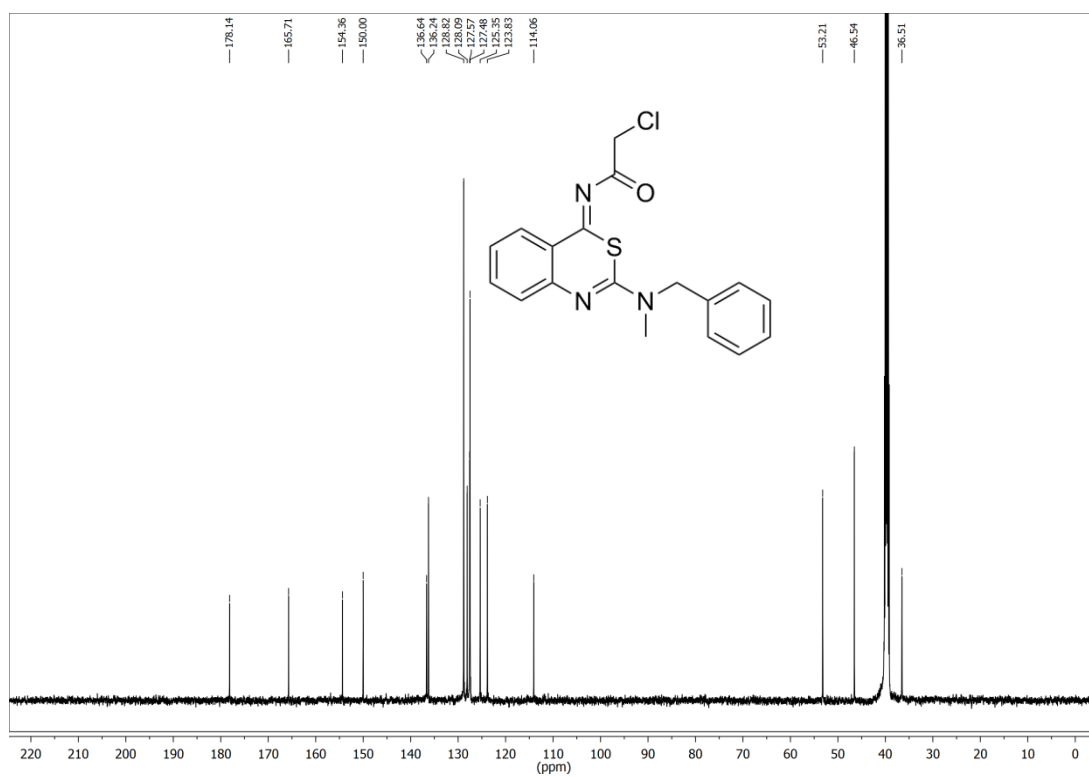

**4-Benzyloxycarbonylimino-2-diethylamino-4H-3,1-benzothiazine (16a), DMSO-*d*<sub>6</sub>**

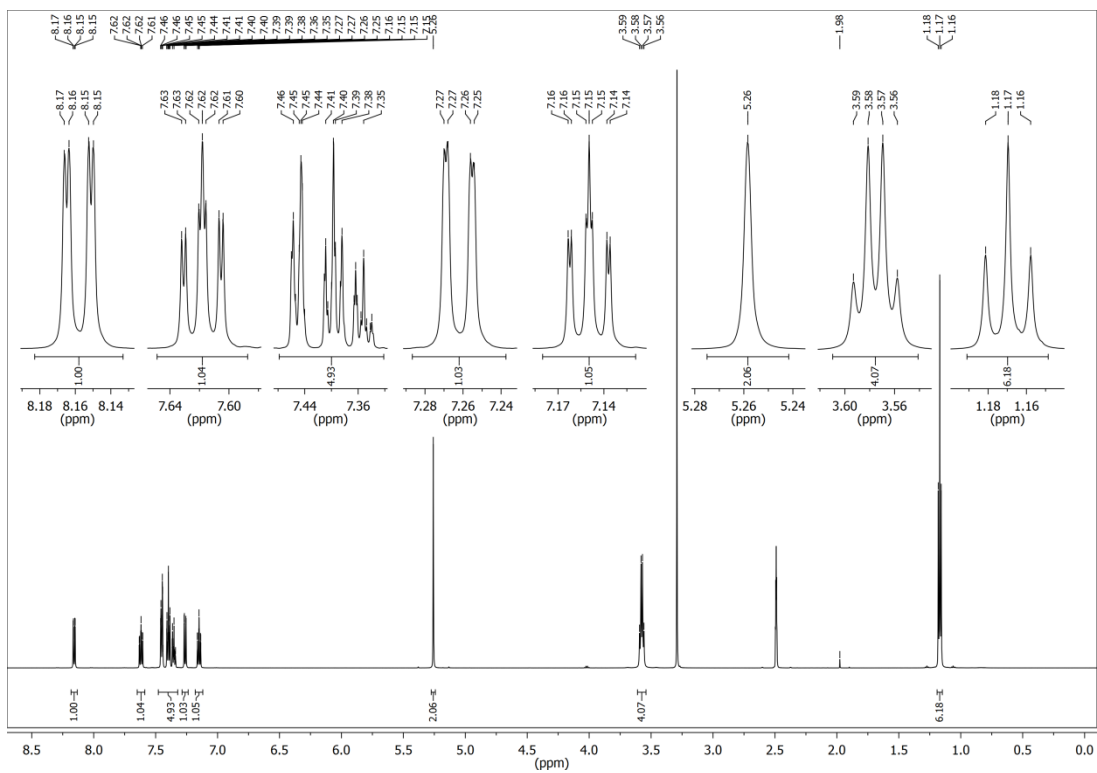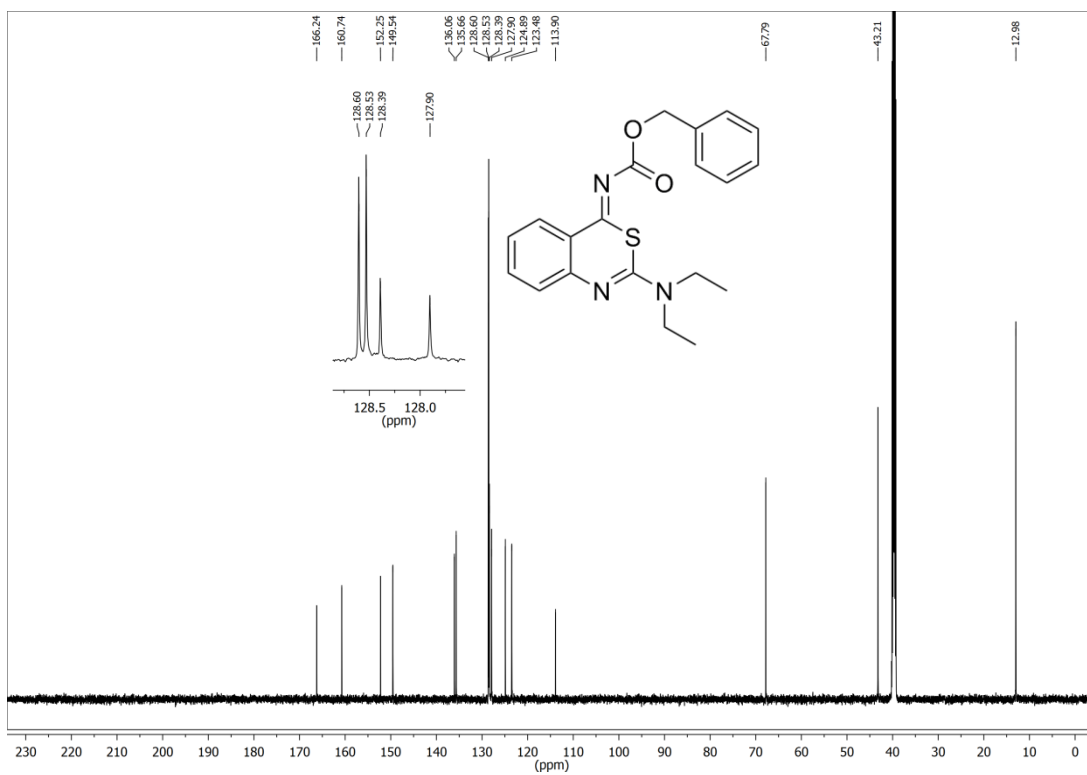

**4-Benzoyloxycarbonylimino-2-morpholino-4*H*-3,1-benzothiazine (16b), DMSO-*d*<sub>6</sub>**

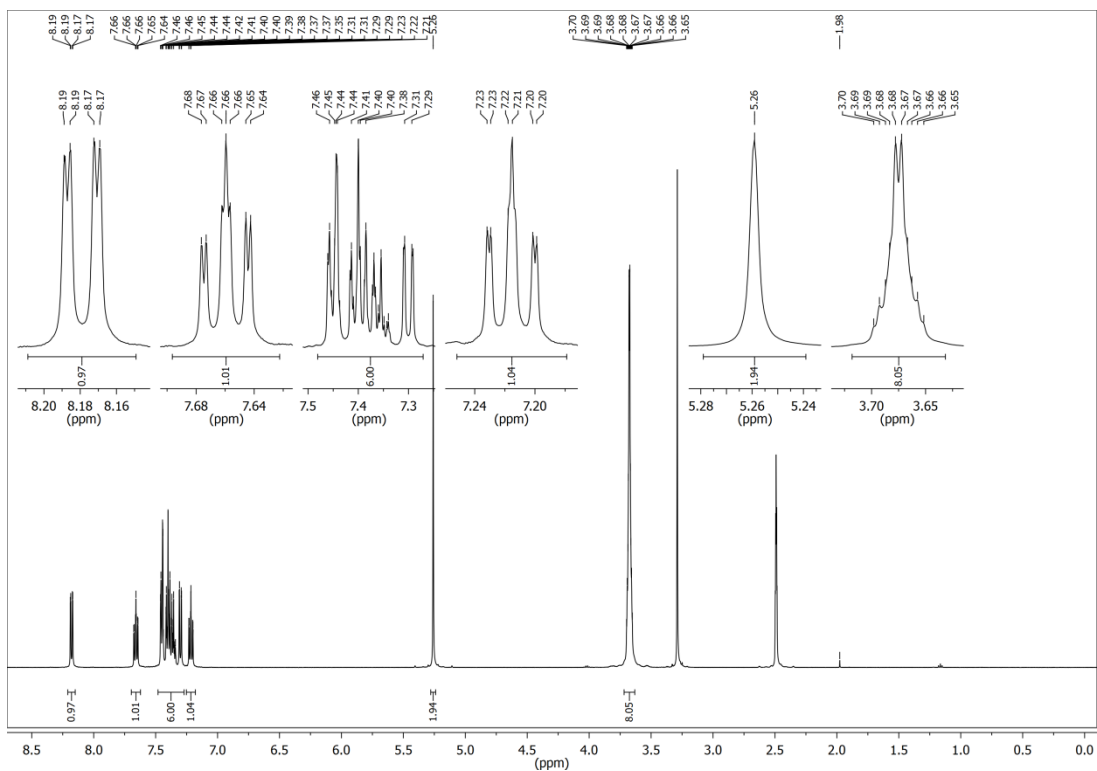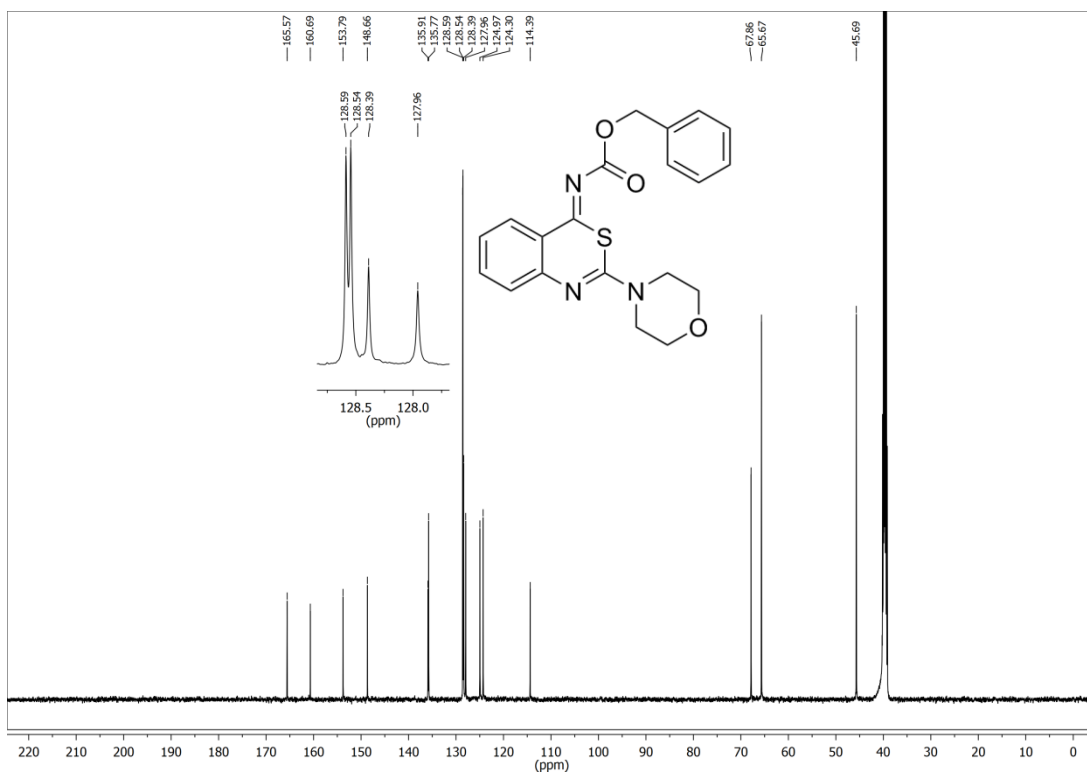

**2-Benzylmethylamino-4-benzoyloxycarbonylimino-4H-3,1-benzothiazine (16c), DMSO-*d*<sub>6</sub>**

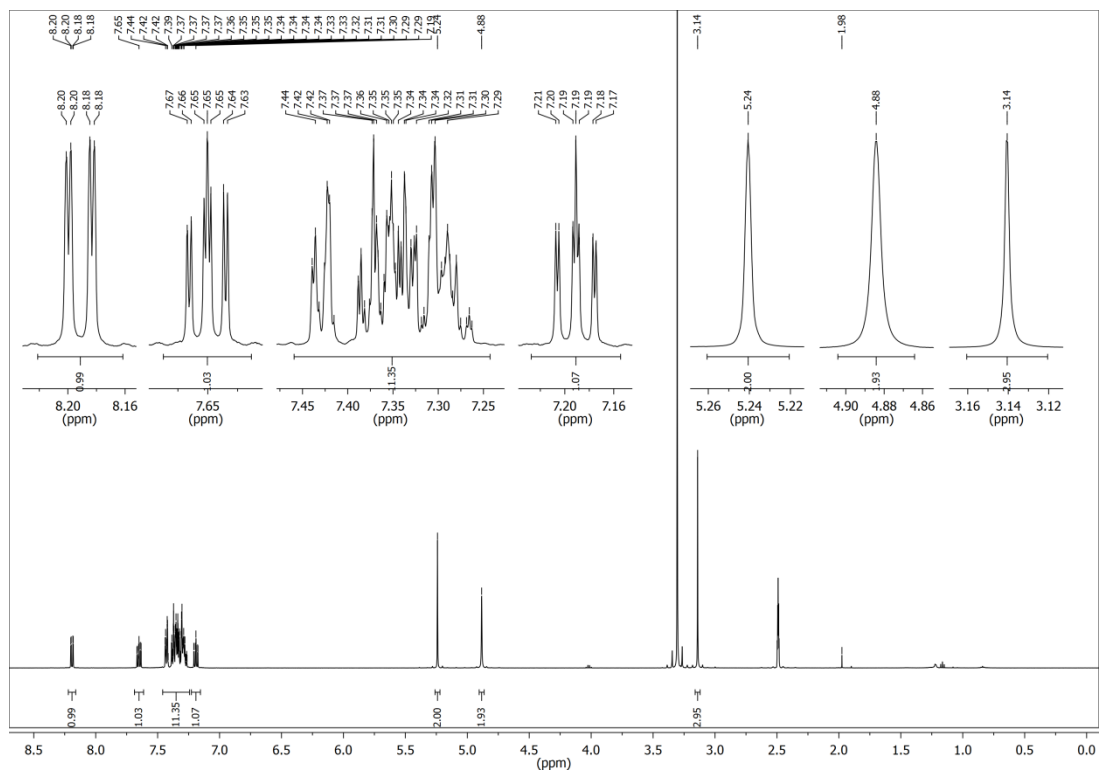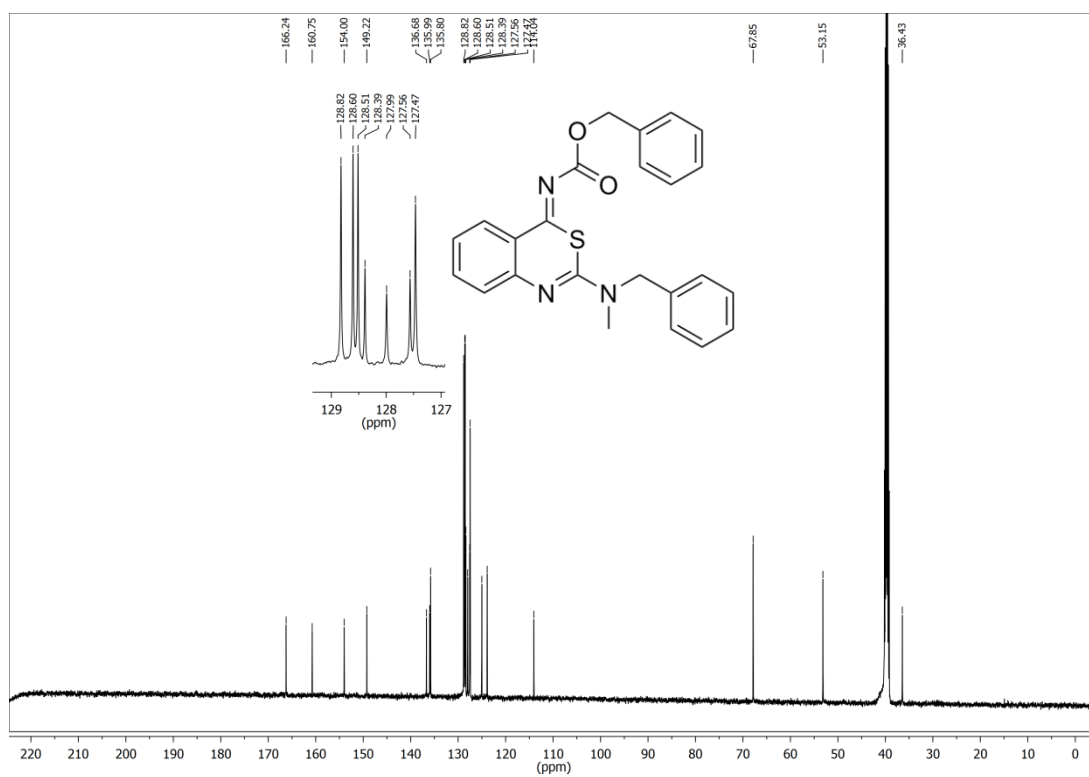

Supplement: c6ra00196c1.pdf [file c6ra00196c1.pdf]
